# Supplementary material
Source: PubMed Central journal article supplement (PMC3318305)
Supplement: supp_11.4.532_FigS1-S2_DataSet1.pdf [file supp_11.4.532_FigS1-S2_DataSet1.pdf]

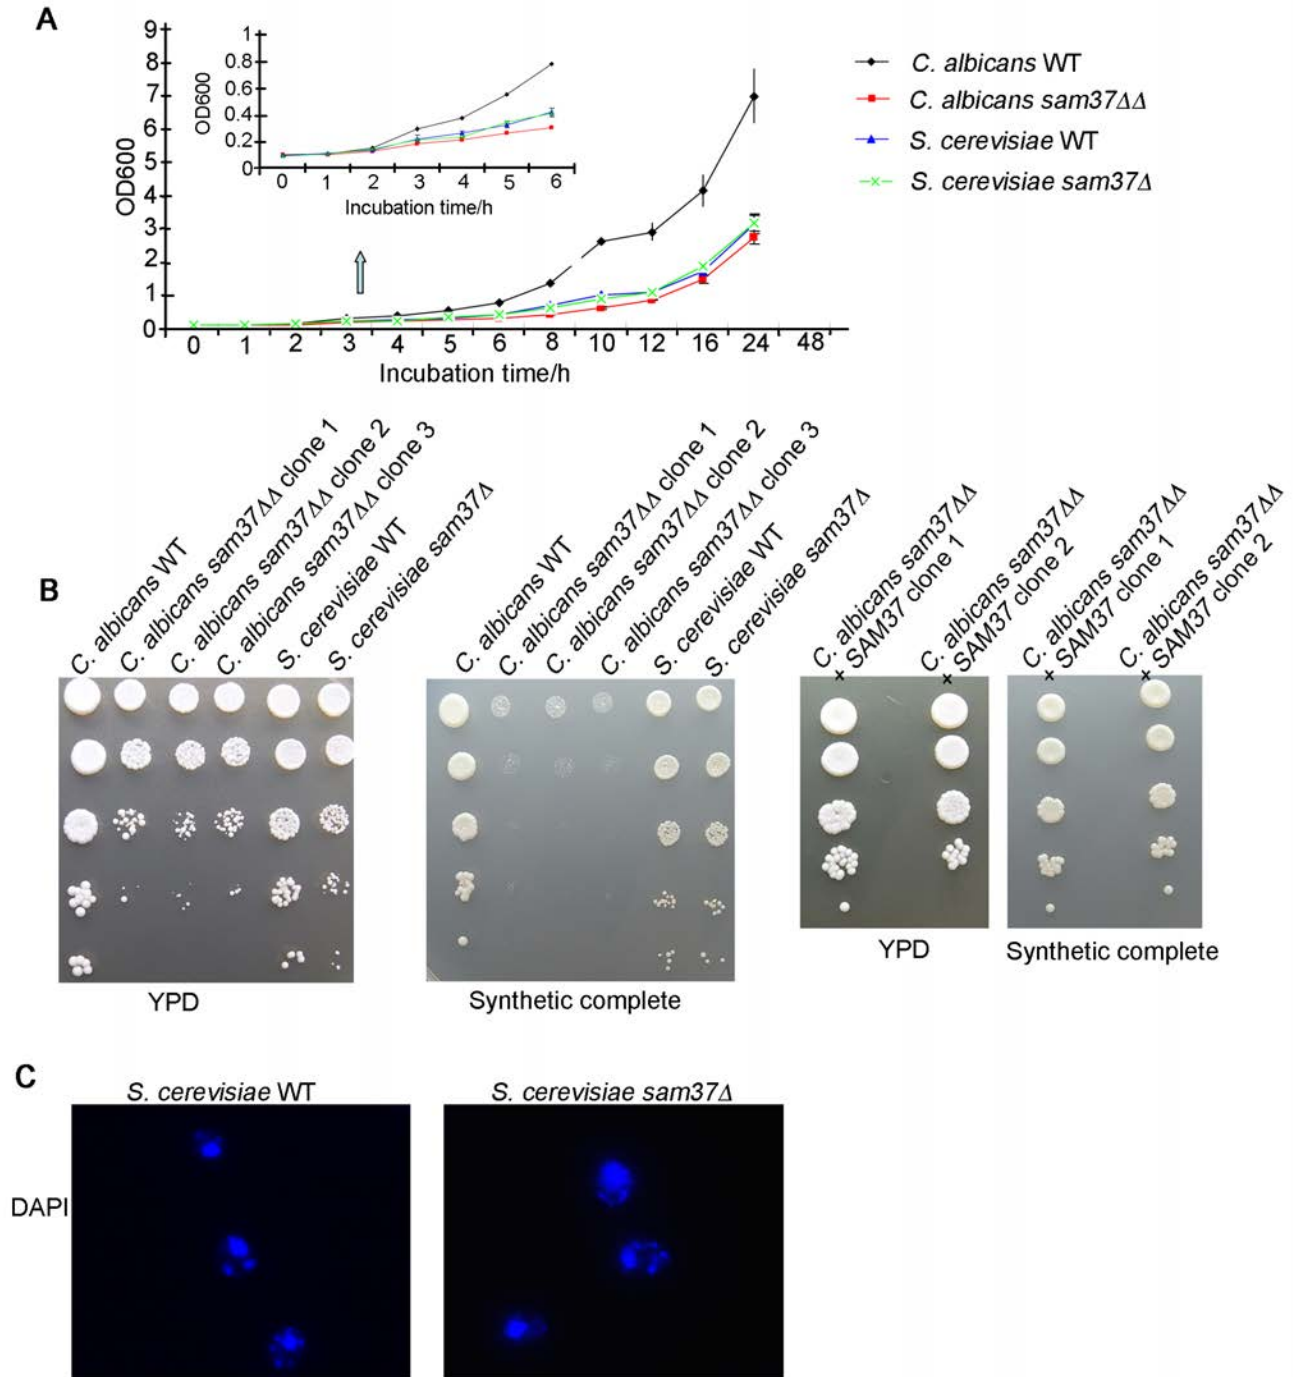

**Supplemental Figure 1. Growth and mtDNA stability upon inactivation of *SAM37* in *C. albicans* and *S. cerevisiae*.** A) Growth of *C. albicans* and *S. cerevisiae* wild types and isogenic *sam37* deletion mutants was assessed in synthetic complete media. Overnight cultures were diluted to  $OD^{600}=0.1$  and growth was monitored by measuring optical density over time. At least two repeats in triplicate were performed. B) Growth of the indicated strains was assessed at 30°C, on YPD or synthetic complete plates.

10 fold serial dilutions starting from  $OD^{600}=0.5$  were dropped on the plates, and growth assessed after 3 days at 30°C. The far right panels show that the slow growth of the *C. albicans sam37ΔΔ* mutant is complemented by re-introducing a wild type copy of the *SAM37* gene into the mutant genome. C) Cells derived from wild type *S. cerevisiae* and the *sam37Δ* mutant were stained with DAPI and visualized by fluorescence microscopy. Clear nuclear (bright staining) and mitochondrial (cytoplasmic punctuate) staining is observed in both wild type and mutant cells.

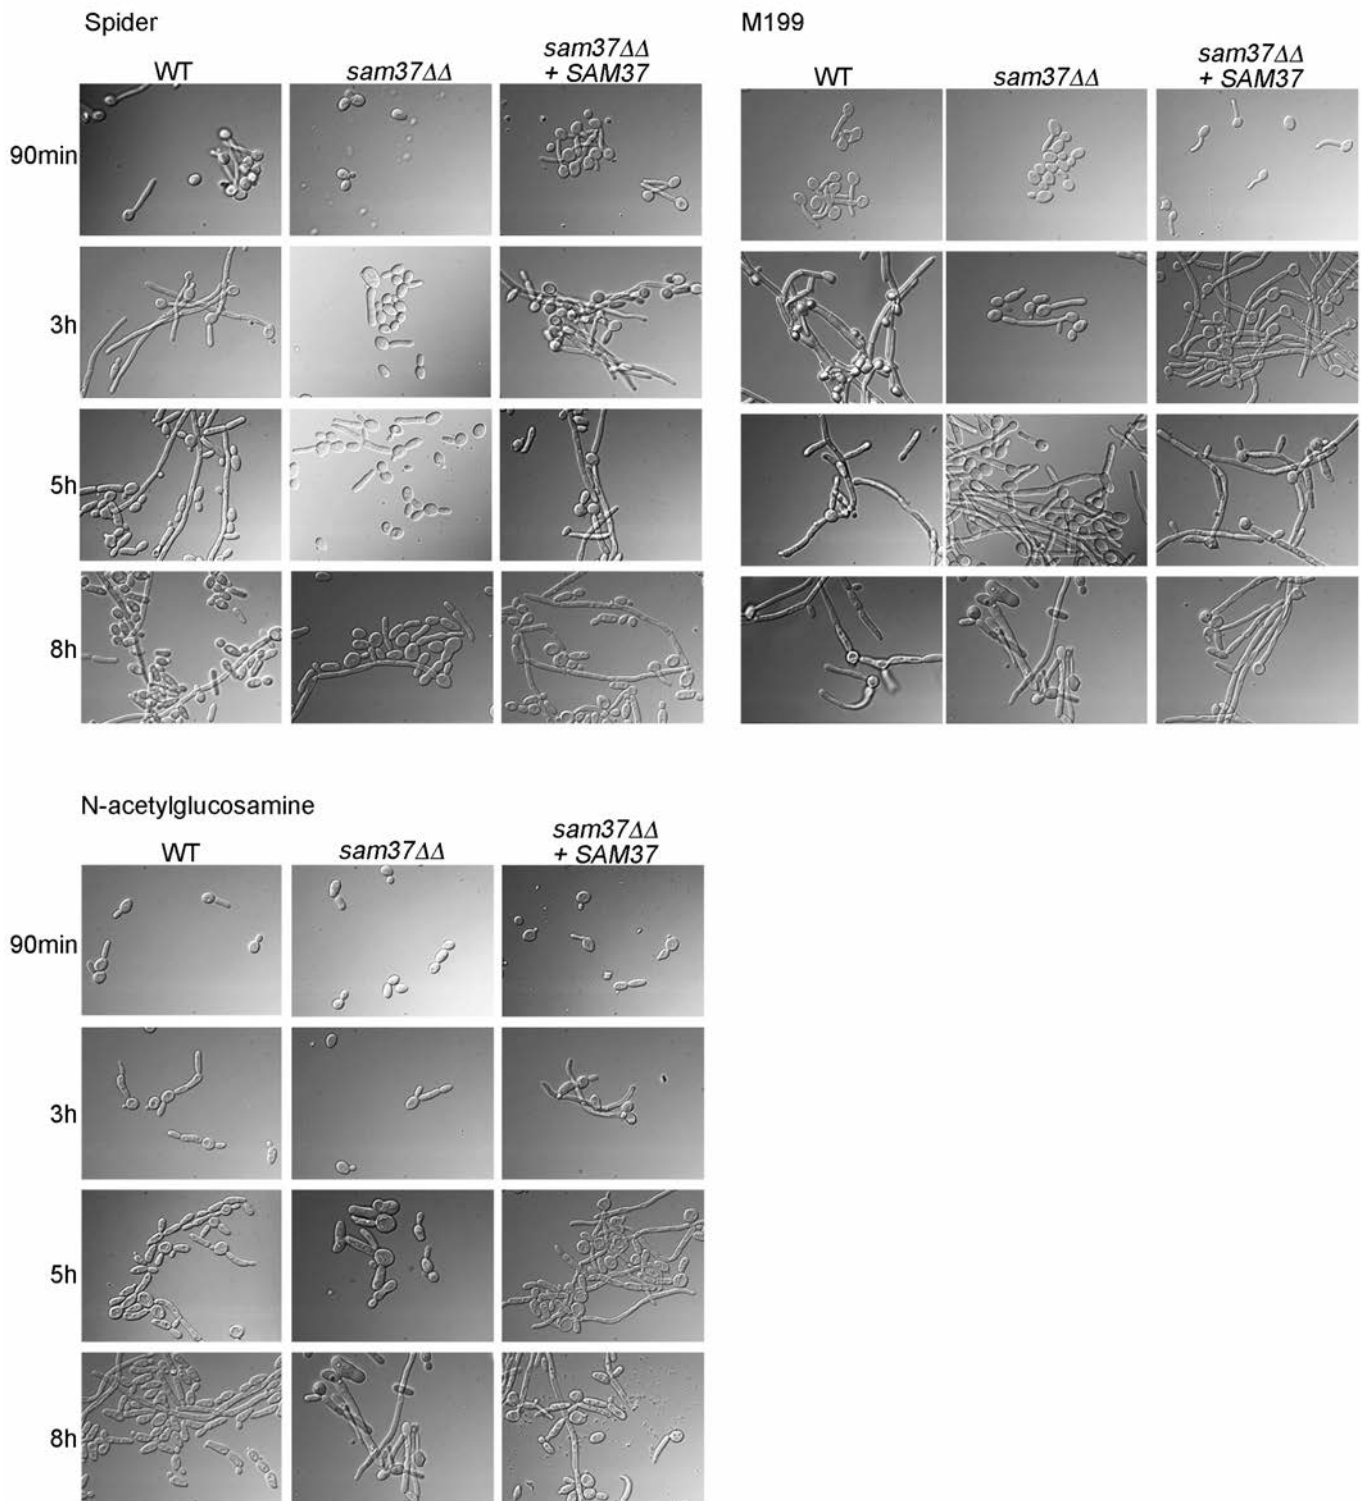

**Supplemental Figure 2. Filamentation by the *sam37ΔΔ* mutant in liquid media *in vitro*.** *C. albicans* cultures from the wild type (DAY185), the *sam37ΔΔ* mutant and the reconstituted strain were grown overnight in YPD and then diluted into pre-warmed filamentation media at 37°C. Development of filaments was monitored by microscopy over time. Filamentation by the mutant was delayed in M199

(see the 3h time point) but after 5h the mutant was filamentous. In Spider media the filamentation defect of the *sam37ΔΔ* mutant was most pronounced.

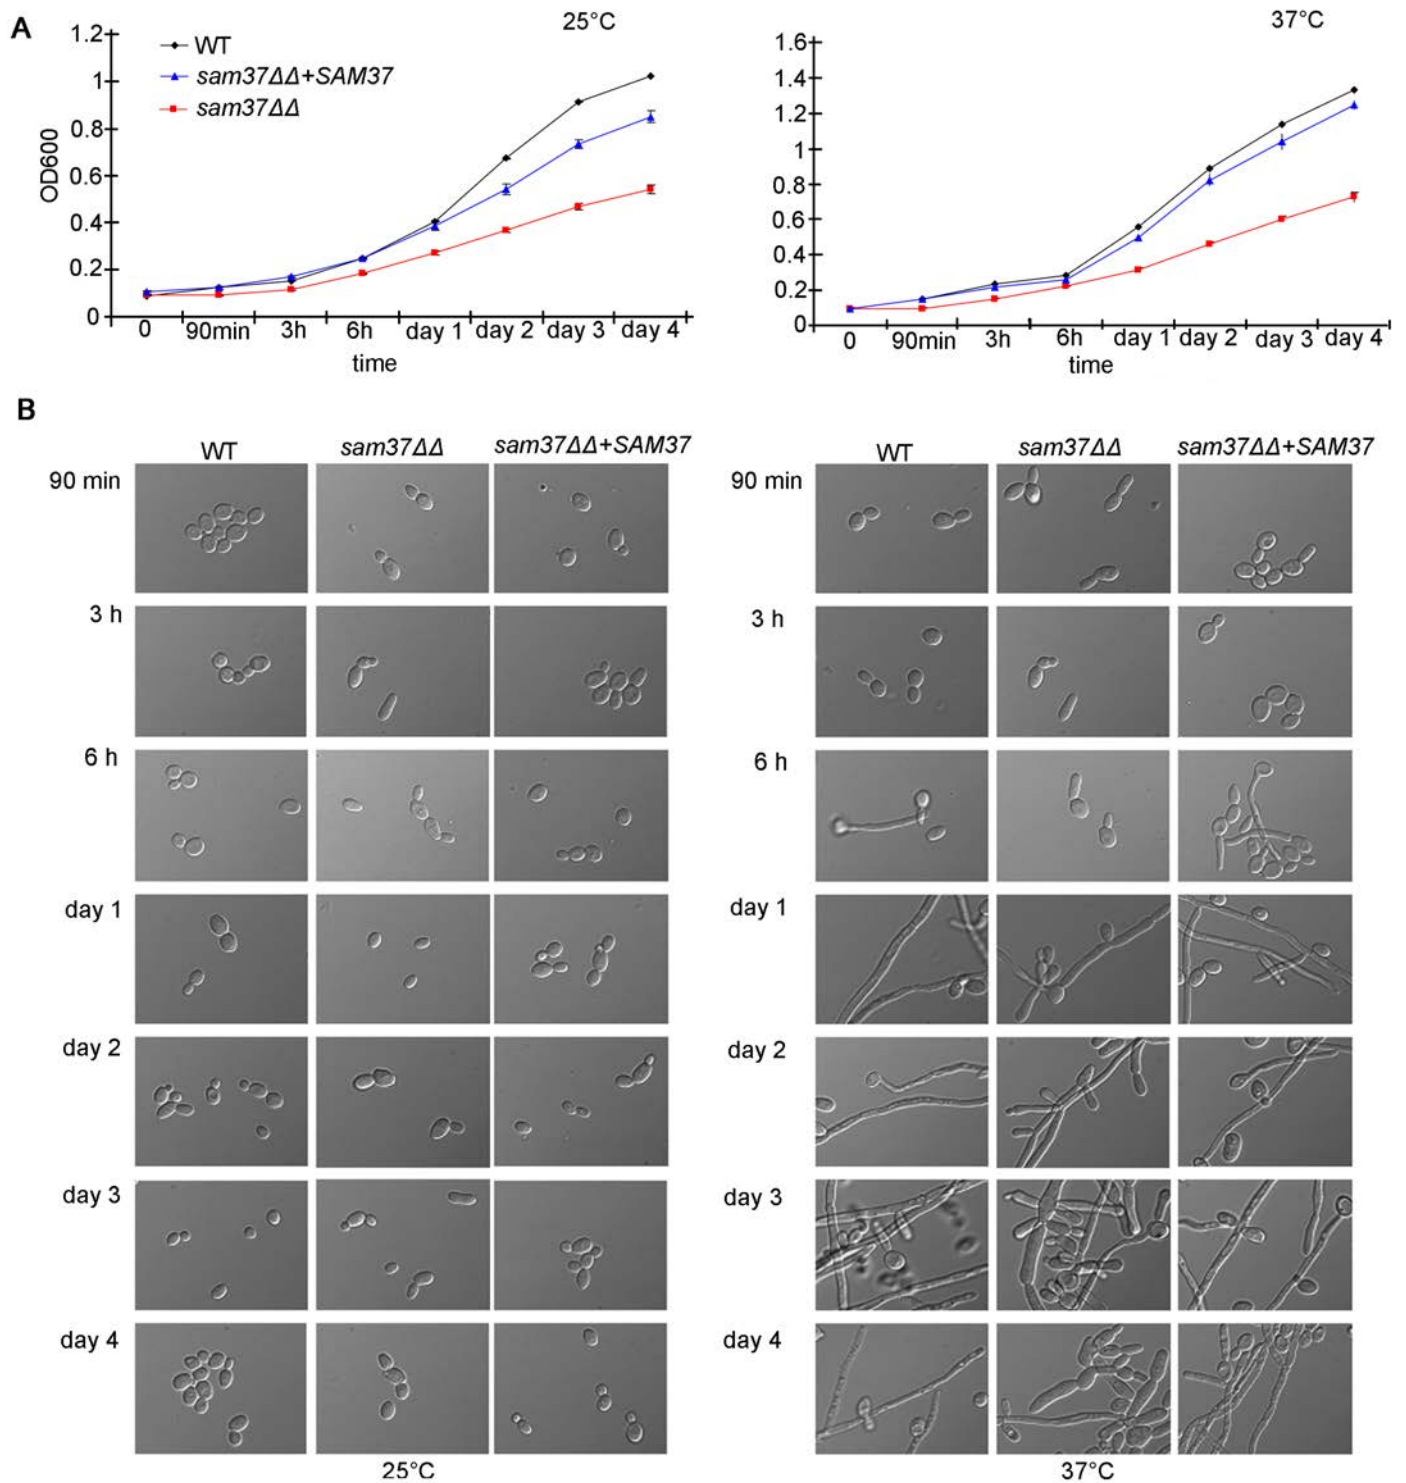

**Supplemental Figure 3. *In vitro* growth and filamentation of wild type and *sam37ΔΔ* mutant *C. albicans* under the conditions used in the worm infection assay.** A) Growth of the indicated strains was assessed in 20% BHI media in M9 buffer, at 25°C or 37°C, by diluting the overnight cultures to

OD<sup>600</sup>=0.1 and measuring optical density of the cultures over time. Three repeats in triplicate were performed. B) Cellular morphology in 20% BHI media in M9 buffer was assessed in liquid media, at 25°C or 37°C over a 4-6 days time course, which parallels the worm infection assay shown in Figure 3. At 25°C *in vitro* all strains stayed in yeast form. At 37°C, the wild type and the complemented strain filamented at the 6 h time point, while the *sam37ΔΔ* mutant was delayed, but filamentation was observed at day 1.



|                       |     |                                                                               |     |
|-----------------------|-----|-------------------------------------------------------------------------------|-----|
| CaSam37 (Q5ALP4)      | 1   | -----MLQLHWGKDNIEISIIISPCIASAYLLNQVLTPTONIEFEIIPSN                            | 44  |
| ScSam37 (SAM37 YEAST) | 1   | -----MVGKSVHLWGKDGKAS-----LISVDSIALVWFIKLCTS                                  | 34  |
| NcSam37 (Q7SFC4)      | 1   | -----MTLELHWG-----PAFGLPSIDAELCLAV                                            | 25  |
| HsMtx1 (MTX1 HUMAN)   | 1   | -----MAAPMELFC-----WSGGWGLPSVDLDSLAVL                                         | 27  |
| AtMtx2 (064471)       | 1   | -----MEGDOETNVYTLVAR-----KPSFDLPTACPNCLPAY                                    | 32  |
| HsMtx2 (MTX2 HUMAN)   | 1   | -----MSLVAAAFVSIQIAAEEP--WPENATLYQQLKGEQIILLSDNAASLAVQ                        | 45  |
| NcSam35 (Q7S734)      | 1   | MATTSAAAPPRKWWQVPRPLQKVFDTFPLLAYDYNVALPARAQSATSGDLPTLYVVFSTEEEAALLGAPSFNPNCLK | 74  |
| ScSam35 (SAM35 YEAST) | 1   | -----MVSSFSPMPVKRIFDFTPLQTYAAQTDKDE-----AVALEIQRRSFTFERGGGSLELT               | 55  |
| CaSam35 (Q59ZS4)      | 1   | -----MNVPATIKSLFDVVPLVLYKDERLPHKG-----PNYPFSEETVAVVNVFNCKGM                   | 50  |
| CaSam37 (Q5ALP4)      | 45  | NTNLSIDINQLPVLIDNETKEKYNGYNEIRFIESKYLSTSTKLSLVSYLPS-----DSLK-----TT           | 101 |
| ScSam37 (SAM37 YEAST) | 35  | EEAKSMVAGLQIVFSNNTD---LSSDGKLPVLILNDGKIVSGYVNIQVFLHKNICTSKYKGTDYEDDLAIVRK     | 105 |
| NcSam37 (Q7SFC4)      | 26  | TYFAQTLISAADYLLVQSSP-SAVPSHHPALYNPSTATWISGFDPIVNYLSTLQPPSYHHPDVT-----TLPS     | 92  |
| HsMtx1 (MTX1 HUMAN)   | 28  | --TYARFTGAPLKVHKISN-PWQSPSGTLPALRTSHGVEISVPHKIITHLRKEKYNADYDL-----SA          | 87  |
| AtMtx2 (064471)       | 33  | --IYLKLAQLPFELAFNST---FPDSDELPYFESDITYAVYNNEDGGVIEKLLKDGIVNLDL-----QL         | 90  |
| HsMtx2 (MTX2 HUMAN)   | 46  | --AFLQMCNLPKVVCRANAEMYSPGKVPFIHVGN-QVVELGPIVQFVKAKGHSLSDGL-----EE             | 105 |
| NcSam35 (Q7S734)      | 75  | WQAFKLKAGVKFQILPSTN--HASPTGALPFILPTRSPPTDAPSPIPSKLHDYALKYGTSNP-----PE         | 137 |
| ScSam35 (SAM35 YEAST) | 56  | VEGTLYKGVYVNFLEANTG---AALATDTPWGLFVQLALCQKNGLVLPTHSQEQTPSHTCN-----HE          | 114 |
| CaSam35 (Q59ZS4)      | 51  | IIPDPIISLIGIVLVAHKNKALPTEQYGRGGIITTSFHASPTNLTPLLIDQTRTRTLDEN-----             | 112 |
| CaSam37 (Q5ALP4)      | 102 | KEKLINLGLINLLINKFEYINQVLYLNKNYENYTRKLFSSYLFPFMYNOPSKYAAQAEQVKILGLS----        | 171 |
| ScSam37 (SAM37 YEAST) | 106 | KDRLLEYSLLNYVDVEISRLTDYQLFLNKNYNEYTKLFSKLLYFPMWYNTPLQLRQARENCEEIIGS----       | 175 |
| NcSam37 (Q7SFC4)      | 93  | RVYADSQAYKALLTSSAAPLLALSIVSSANSETTRPAYSAILPFPLPWTEPLAVRAAMAARAHLGMS---        | 163 |
| HsMtx1 (MTX1 HUMAN)   | 88  | ROGADTLAFMSLLEEKLLPVLVHTFVIDTKNYVEVTRKWAAEAMPFLNFFLGRMQRQYMERLQLLTGE---       | 157 |
| AtMtx2 (064471)       | 91  | QSLSDYLSLKALIVSWLEEALTYEIWVGTEGSS--TSKIYYSDDLWVTSKVLFYKQTLAKNRLGITKEN---      | 158 |
| HsMtx2 (MTX2 HUMAN)   | 106 | VQKAEMKAYMELVNNMLLTAELYLOWCDEATVGEITHARYGSPYPLNHLILAYOKOMEVKKRMMKAIWGG---     | 175 |
| NcSam35 (Q7S734)      | 138 | VSALRLDAQALLDVPINAWLQALYRDP-EYTDLLDRFYITPASSYVWRGALRHOLRRAAETIILTKPGGA        | 210 |
| ScSam35 (SAM35 YEAST) | 115 | MLVLSRLSNPDEALPTLVEGYKRIIRSVAISEIMRSRILODDAEQLMYTLLDQTLVLYDCWITIQIFCAS---     | 184 |
| CaSam35 (Q59ZS4)      | 113 | HTVANDLDEPAKLINEIDIKFYDIWVLCILCEDIATTFGVDTLKSLDLLAEVPMNWNFAVRHPNTINIP---      | 182 |
| CaSam37 (Q5ALP4)      | 172 | -KQKVSFFDFTTGNNEQGSIDVAPTELIN-----                                            | 199 |
| ScSam37 (SAM37 YEAST) | 176 | -LTLFDEEFVESKAMESASQLAQSKTKF-----                                             | 203 |
| NcSam37 (Q7SFC4)      | 164 | LDTDAEMERLEREREEREAAGVQVTPKALRKAVGGQNSGVKQLSPENKRIKLEGLAAEVFDVLGEVDFLEEE      | 237 |
| HsMtx1 (MTX1 HUMAN)   | 158 | -HRPEDEEELEKELYREARECLTLLSQRL-----                                            | 185 |
| AtMtx2 (064471)       | 159 | -AEQREK-----QIYKRASEA YEALSTR-----                                            | 181 |
| HsMtx2 (MTX2 HUMAN)   | 176 | -KKTLD-----QVLEDVDQCCQALSQRL-----                                             | 197 |
| NcSam35 (Q7S734)      | 211 | ASTAVSLLVDEHSVYRAAVQALEALATLL-----                                            | 239 |
| ScSam35 (SAM35 YEAST) | 185 | -DAQFMELYSCQKLSGSIVTPLDVENSL-----                                             | 212 |
| CaSam35 (Q59ZS4)      | 183 | -----KLYSQQLVFEFYLDDL-----                                                    | 199 |
| CaSam37 (Q5ALP4)      | 200 | -----DEDD--EEGDEDEDGANVAISSLHERQLLKKSKSQVLEKSRNSMKCLILITQYIERFKTIFQ----       | 260 |
| ScSam37 (SAM37 YEAST) | 204 | -----IAHK--NKIKGQELQVQYVNLQFNRLQSCVSNWLAAR---KLLDDSVILSSDLLFLANLYV-----       | 261 |
| NcSam37 (Q7SFC4)      | 238 | DGEEEEEEEEEAKEGGARIKVTLTKCLAFAYLALMLLPEVPRPWLKEVLQKQYAGLCKFVLEYRRKTFPDSGK     | 311 |
| HsMtx1 (MTX1 HUMAN)   | 186 | -----GSDK--FFFG-DAPASLDAFVFSYLALLQAKLPSGKLO---VHLRGLHNLCACTHILSLY---          | 241 |
| AtMtx2 (064471)       | 182 | -----GEQK--FLFE-DRPSSLDAPLLSHILFIQALPVTSVLR---CKLLEHNSLVRYAEKLFSEFL---        | 238 |
| HsMtx2 (MTX2 HUMAN)   | 198 | -----GTDP--YFFN-KOPTELDALVFGHLYTILTTQLTNDLS---EKVKYNSNLLAFCCRREEQHY---        | 253 |
| NcSam35 (Q7S734)      | 240 | -----SESKTGWFFGAETPTIFDASVFAITHMLMKYMS--DAEG---EVEGNMGFILASRKLGTMVR---        | 296 |
| ScSam35 (SAM35 YEAST) | 213 | -----KLSAKSLKISLTKRKNKQFRHREIVKSMQGVYVHHNSVNVQEQVNLVLFENSQVLIILGLK---D        | 274 |
| CaSam35 (Q59ZS4)      | 200 | -----ESYDHPITINLKLAGYIIVINQLLSSTRLGK---IVCTKHALLSRYSYLLNLHT---                | 249 |
| CaSam37 (Q5ALP4)      | 261 | -HQQRDSDEEFGFIENNQNPSSEILFYAYIFCLTYEKLPRDFIFNYLKLKQDYTLKFITEIMNKNQISKNKFR     | 333 |
| ScSam37 (SAM37 YEAST) | 262 | -QLGLPDGNRIRSKLEQTFGSELLNSNKIDDFVHRPSNNLEQRDPQFREQGNVMSLYNLACKYI-----         | 327 |
| NcSam37 (Q7SFC4)      | 312 | VLPWADRESDPAVSACDSALSIVGRFVRAVIDDIPMLGREWSRWALRQRRVAEENSQVAVVRRSVEGERS        | 385 |
| HsMtx1 (MTX1 HUMAN)   | 242 | -FPWDGAEVPPQROTPAGPETEEEEYRRRNQILSVLAGLAAMVGYALLSGIVSIQRATPARAPGTRTLGMAEED    | 314 |
| AtMtx2 (064471)       | 239 | -EASSSSPSPPLHSPSSFPKRSKPKSKPKVEKTEEEKKFKKRARFFLAAQFLAVVIYVSMVGGSSDELEYE       | 311 |
| HsMtx2 (MTX2 HUMAN)   | 254 | -FEDRGKGRLS-----                                                              | 263 |
| NcSam35 (Q7S734)      | 297 | -SAGSGELEQHRRLLFELLWLAADSNALLDAKARGNKLLQFQLQA-----                            | 340 |
| ScSam35 (SAM35 YEAST) | 275 | MLKSDGQPTYLHLKIASYLILCITNVEPKIKLKTFFVENECKELVQFAQDTLKNFVQ-----                | 329 |
| CaSam35 (Q59ZS4)      | 250 | -----TI-----                                                                  | 251 |
| CaSam37 (Q5ALP4)      | 334 | NPIGNEIPSLTNEVKYWIGSIEY-----                                                  | 356 |
| ScSam37 (SAM37 YEAST) | 386 | LLLAGAGLTLAINVAGLGIYWRYRGLLQAPLQWHRPLVGLGSFGAAGAMFAGLA                        | 442 |
| NcSam37 (Q7SFC4)      | 315 | EEE-----                                                                      | 317 |
| HsMtx1 (MTX1 HUMAN)   | 312 | DEDD-----                                                                     | 315 |
| AtMtx2 (064471)       | 312 | DEDD-----                                                                     | 315 |
| HsMtx2 (MTX2 HUMAN)   |     |                                                                               |     |
| NcSam35 (Q7S734)nbsp; |     |                                                                               |     |
| ScSam35 (SAM35 YEAST) |     |                                                                               |     |
| CaSam35 (Q59ZS4)      |     |                                                                               |     |

**Supplemental Figure 4. ClustalW alignment of the fungal Sam35 and Sam37 proteins with the animal metaxins. Ca-*Candida albicans*, Sc- *Saccharomyces cerevisiae*, Nc-*Neurospora crassa*, Hs-*Homo sapiens*, At-*Arabidopsis thaliana***

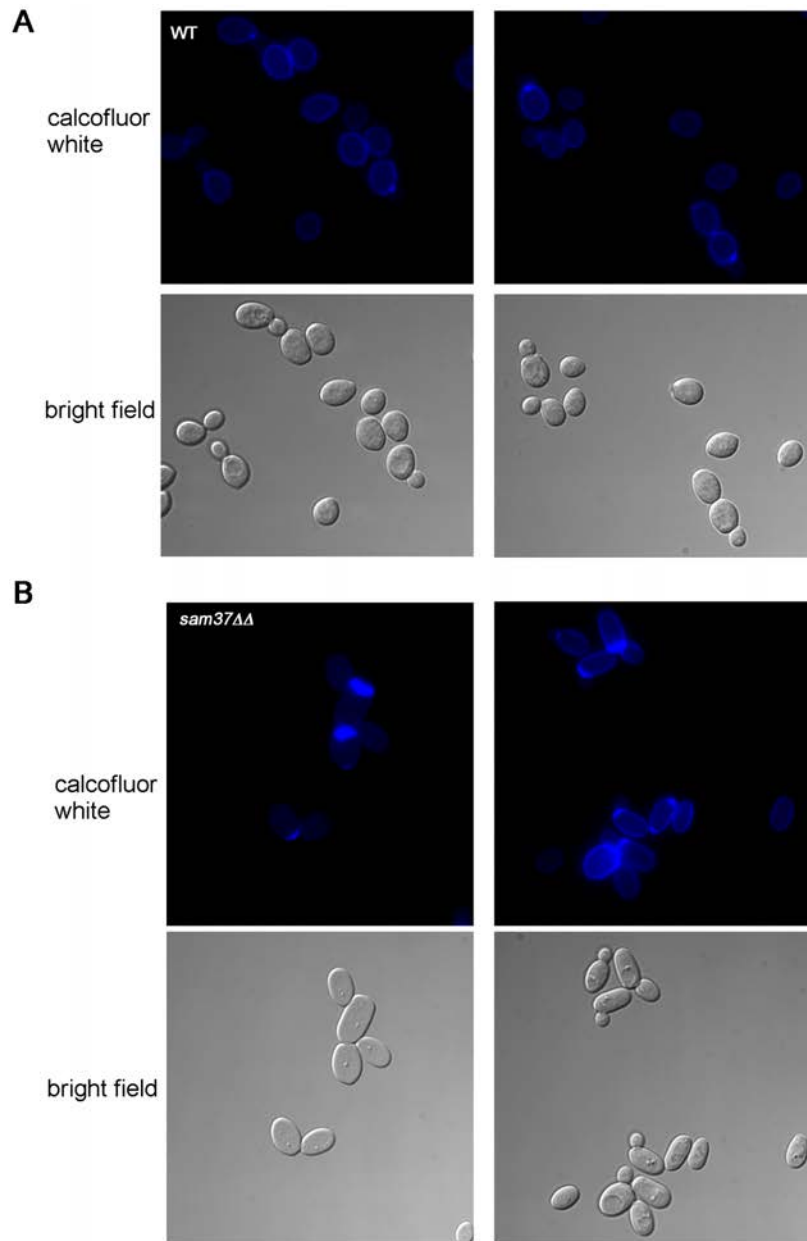

**Supplemental Figure 5. Calcofluor white staining of *C. albicans* *sam37ΔΔ* mutants** Cells from wild type (A) and mutant cultures (B) were grown over night in YPD and stained with calcofluor white (250μg/ml). Micrographs were taken with the 100X objective. Bright field and calcofluor white stained cells are shown, two fields for each of the wild type and mutant cultures.



>Q6PKY5\_XENLA [ (score: 6.80e-246, model: Metaxin1) Q6PKY5\_XENLA Metaxin 1 (LOC407749 protein). ]  
MAAPMELYCWKGDWGLPSVDPDCLTVLTYAKFSGAPLKVHKITNPWRSPSGRLPALKTSDDGVLFQPSRIITHLRKQKYN  
ADYDLSARQGADTLAFISLLEEKLLPALIHSFWVEGKNYVEHTRKWYAESIPFPLNFFLPNQMHKRNMERLKLIRGESWR  
EEDDEMEGRLYTDAHECLSLLSQRLANNNFFFGDSPASLDAVYVFSHLAPILNAKLPNNKLOHLSLPLNLCRYCTSIITV  
YFPWEQESGPRVAPKPPSAETQDTEDDPHKRRNQVLSVLAGLLAMVGYAVLSGIVSIQRVAPDHALEQGITMEDNEEEEE  
>Q5RKQ2\_DANRE [ (score: 4.70e-241, model: Metaxin1) Q5RKQ2\_DANRE Metaxin 1b. ]  
MAAPLELFCWKG DYGLPSVDVDC LAVLAYAKFAGAPLKVHKITNPWRSPSGSLPALKTREEEGSISQPSKIIH LRKQKYN  
ADYDLSAKEGADTLAFVSLLEEKLLPALVYTLWIDSKNYVDVTRCWYAENIPFPLNFFLPNRMHSQQLEKLR LVRGDPVL  
EPGEQLEKELYRDAFECMTLLSQRLG SQKFFFGDSPSSLDAYVFAHLAPLLKIKLPNGKLOHLSLNNLEQFCSNILL  
YFPSDQREAPARKIHVQSDSSDFDNEPHMRRNQILSVLFAVGAMLYAVLTGIITIKRERPOLKNSSHEDGDEEDED  
>Q4R3I0\_MACFA [ (score: 5.40e-241, model: Metaxin1) Q4R3I0\_MACFA Testis cDNA  
clone: QtsA-16827, similar to human metaxin 1 (MTX1), transcript variant 1,. ]  
MAAPMELFCWGGWGLPSVDLDSLAVLTYARFTGAPLKVHKISNPWRSPSGTLPALRTSHGEVISVPHKIIH LRKQKYN  
ADYDLSARQGADTLAFMSLLEEKLLPVLVHTFWIDTKNYVEVTRKWYAEAMPFPLNFFLPGRMQRQYMERLELLSGEHP  
EDEEELEKELYREARECLTLLSQRLG SQKFFFGDAPASLDAFVFSYLALLLQAKLPSGKLOAHLRGLHNLCA YCTHILSL  
YFPWDGAEVPPRQTPAGPETEEEEPYRRRNQILSVLAGLAAMVGYALLSGIVSIQRATPARAPGTRALGMAEED EEE  
>Q1L8P8\_DANRE [ (score: 1.50e-240, model: Metaxin1) Q1L8P8\_DANRE Metaxin 1. ]  
MAAPLELFCWKG DYGLPSVDVDC LAVLAYAKFAGAPIKVHKITNPWRSPSGSLPALKTREEEGSISQPSKIIH LRKQKYN  
ADYDLSAKEGADTLAFVSLLEEKLLPALVYTLWIDSKNYVDVTRCWYAENIPFPLNFFLPNRMHSQQLEKLR LVRGDPVL  
EPGEQLEKELYRDAFECMTLLSQRLG SQKFFFGDSPSSLDAYVFAHLAPLLKIKLPNGKLOHLSLNNLEQFCSNILL  
YFPSDQREAPARKIHVQSDSSDFDNEPHMRRNQILSVLFAVGAMLYAVLTGIITIKRERPOLKNSSHEDGDEEDED  
>Q4VX25\_HUMAN [ (score: 7.30e-240, model: Metaxin1) Q4VX25\_HUMAN Metaxin 1. ]  
MLLGGPPRSPRSGTSPKGPWSSTGHVQFGKSPQTWPRRTRPRSPEPAAPSGVGRGSTWTRRRDTPRRAGPTALSRYVGH LW  
MGRPPSPEARGPVPRSSAASRARRSLASPGISPGPLTATIGGAVAGGGPRQGRAEAHKEVFPGQRV GKMAAPMELFCWS  
GGWGLPSVDLDSLAVLTYARFTGAPLKVHKISNPWQSPSGTLPALRTSHGEVISVPHKIIH LRKQKYNADYDLSARQGA  
DTLAFMSLLEEKLLPVLVHTFWIDTKNYVEVTRKWYAEAMPFPLNFFLPGRMQRQYMERLQLLTGEHRPEDEEELEKELY  
REARECLTLLSQRLG SQKFFFGDAPASLDAFVFSYLALLLQAKLPSGKLOVHLRGLHNLCA YCTHILSLYFPWDGAEVPP  
QRQTPAGPETEEEEPYRRRNQILSVLAGLAAMVGYALLSGIVSIQRATPARAPGTRTLGMAEED EEE  
>MTX1\_HUMAN [ (score: 7.30e-240, model: Metaxin1) MTX1\_HUMAN Metaxin-1. ]  
MAAPMELFCWGGWGLPSVDLDSLAVLTYARFTGAPLKVHKISNPWQSPSGTLPALRTSHGEVISVPHKIIH LRKQKYN  
ADYDLSARQGADTLAFMSLLEEKLLPVLVHTFWIDTKNYVEVTRKWYAEAMPFPLNFFLPGRMQRQYMERLQLLTGEHRP  
EDEEELEKELYREARECLTLLSQRLG SQKFFFGDAPASLDAFVFSYLALLLQAKLPSGKLOVHLRGLHNLCA YCTHILSL  
YFPWDGAEVPPQRQTPAGPETEEEEPYRRRNQILSVLAGLAAMVGYALLSGIVSIQRATPARAPGTRTLGMAEED EEE  
>Q8R5C0\_MOUSE [ (score: 2.10e-239, model: Metaxin1) Q8R5C0\_MOUSE Metaxin 1 (Lung  
RCB-0558 LLC cDNA, RIKEN full-length enriched library, clone:G730021A22  
product:metaxin 1, full insert sequence )  
MAAPMELFCWGGWGLPSVDLDSLAVLTYTRFTGAPLKIHKTSNPWQSPSGTLPALRTSDGKVIITVPHKIIH LRKQKYN  
ADYDLSARQGADTLAFMSLLEEKLLPVLIIHTFWIDAKNYVEVTRKWYAEAMPFPLNFFLPGRMQRQYMERLQLLCGEHKS  
ENEELEKELYQEARECLTLLSQRLG SQKFFFGDAPASLDAFVFSHLALLLQAKLPSGKLOAHLRGLHNLCA YCTHILNL  
YFPRDGDEVPLPRQTPAAPETEEEEPYRRRTQILSVLAGLAAMVGYALLSGIVSIQRTSPARAPGTRALGLAEDEED  
>MTX1\_MOUSE [ (score: 9.90e-239, model: Metaxin1) MTX1\_MOUSE Metaxin-1. ]  
MAAPMELFCWGGWGLPSVDLDSLAVLTYTRFTGAPLKIHKTSNPWQSPSGTLPALRTSDGKVIITVPHKIIH LRKQKYN  
ADYDLSARQGADTLAFMSLLEEKLLPVLIIHTFWIDAKNYVEVTRKWYAEAMPFPLNFFLPGRMQRQYMERLQLLCGEHKS  
ENEELEKELYQEARECLTLLSQRLG SQKFFFGDAPASLDAFVFSHLALLLQAKLPSGKLOAHLRGLHNLCA YCTHILNL  
YFPRDGDEVPLPRQTPAAPETEEEEPYRRRTQILSVLAGLAAMVGYALLSGIVSIQRTSPARAPGTRALGLAEDEED  
>Q4KLN2\_RAT [ (score: 1.80e-238, model: Metaxin1) Q4KLN2\_RAT LOC295241 protein  
(Fragment). ]  
RCSRGHVQFGSKPQRPLSRTRCPSSKPCLSPAVRGYARQRHRESPKRAWTAALLPYGGRLRTSPRRSSEGQCSTSSSAAA  
SPAARSHASLDLKL RVATQAETRGCSWREKADAYERVLPQORMCKMAAPMELFCWGGWGLPSVDLDSLAVLTYTRFTC  
APLKVHKISNPWQSPSGTLPALRTSSGKVIITEPHKIIH LRKQKYNADYDLSARQGADTLAFISLLEEKLLPMLIHTFWI  
DAKNYVEVTRKWYAEAMPFPLNFFLPGRMQRHMERLQLLCGEHRLESEEELEKELYQEARECLTLLSHRLGSRKFFFGD  
APASLDAFVFSHLVLLLQAKLPSGKLOAHLRGLQNL CVYCTHILNLYFPRDATDVPPPPCQTPAGPETEEEEPYRRRTQIL  
SVLAGLAAMVGYALLSGIVSIQRASPARAPCTQALDLAEDEED  
>Q27HK4\_PIG [ (score: 2.00e-236, model: Metaxin1) Q27HK4\_PIG Metaxin 1. ]

MAAPMELFCWGGWGLPSVDLDSLAVLTYARFTGAPLKVHKITNPWRSPSGTLPALRTSQGEVIVSVPHKIITHLRKEKYN  
ADYDLSARQGADTLAFMSLLEEKLLPVLHTFWVDKKNYVEVTRKWYAEAMPFPLNFFLPGRMQRQYMERLQLLCGEHRP  
EEEELEKELYQEARECLTLLSQRLLGAQKFFFGDAPASLDAFVFSYLALLQAKLPSGKLOAHLRGLHNLCAYCTHILSL  
YFPWEGAQVPRPQTPASSETEEEEPYRRRNQILSVLAGLAAMAGYALLSGIVSIQRAPPARAPSTRALGMAEEDDEE  
>A4QNH5\_XENTR [ (score: 1.50e-235, model: Metaxin1) A4QNH5\_XENTR Metaxin 1. ]  
MAAPMELYCQKGDWGLPSVDPDCLTVLTYAKFSGAPLKVHKVTNPWRSPSGRLPALKTHDDGVLFQPSKIIITHLRKQKYN  
ADYDLSAQGADTLAFISLLEEKLLPALIHSFWVEGKNYVEHTRRWYAESIPFPLNFFLPNQMHKRNLERLQLIRGDSWR  
EEDDTERQLYTDAQECSLLSQRLLAKHKFFFGDSPASLDAVYFVSHLAPILSAKLPNNKLQOHLSSLPNLCQYCRAILTI  
YFAWEGDSGPRITPKPQSGETPDTEEEPHKRRNQVLSVLVGLLAMVGYAVLSGIVSIQRVGPDPHALEQGIAMEDNEEEEEE  
>Q2TBS1\_BOVIN [ (score: 1.70e-230, model: Metaxin1) Q2TBS1\_BOVIN Metaxin 1. ]  
MAAPMELFCWGGWGLPSVDLDSLAVLTYARFTGAPLKVHKITNPWRSPSGTLPALRTSHGEVIVSVPHKIITHLRKEKYN  
ADYDLSARQGADTLAFMSLLEEKLLPVLKHTFWIDAKKNYVEVTRKWYAEAMPFPLNFFLPGRMQRQYMERLQLLCGEHRP  
EDEEELEKELYQEAEQECLELLSQRLLGSQKFFFGDAPASLDAFVFSYLALLQAKLPSGKLOAHLRGLHNLCAYCAHILSL  
YFPWEGAKAPPRQTPANPETEEEEPYRRRNQILTVLAGLAAMAGYALLSGIVSIQRAPSARAPGTQALGMAEEDDEE  
>Q4SW18\_TETNG [ (score: 1.30e-224, model: Metaxin1) Q4SW18\_TETNG Chromosome  
undetermined SCAF13694, whole genome shotgun sequence. (Fragment). ]  
MAAPEELFCWEGDWGLPSVDTDCLVVLAYAKFAGAPLKLQKLSNPWRSPSGCLPALRTSRKETLSRPSDIIHHRKQKFN  
ADFDLSAKEGADSLAFISLIEEKLRPALLYAFWAEPKNYVDVTRCWYGEHLFPFPLNFFLPQGMORRQLAKLCLQRGQOSL  
EVGEELEKEVSLGGARSPRSLWAGPASASRFLPQLYRDAECMNLSSQRLLGSHKFFFGDSPSSLDAYAFGHLAPILRC  
KLPSGRLQOHLKSLDNLSSFCNVLLLYFPRDGPPEGGAARTSSPPDAPDFEQVFNKRRKQLLSALVALGAMLSYALLTGM  
LSIQHVQDELQGLGAEEDDEE  
>A2THY5\_DANRE [ (score: 1.30e-202, model: Metaxin1) A2THY5\_DANRE Metaxin 1a. ]  
MAAPCELFCWKAGLGLPSVNTDCLIVLAYARFAGAPLKIHKISNPWRSPGSLPALRTKDEGSCSQPSQIIIIQLRKQKFN  
ADYDLSAKEGADTLAFISLLEERLLPALIYALWIDPKNYVEVTRRWYGENMSFPLNFFLPGRMQRQYMERLRLIRGNGLT  
EAGEEAEKELYHDALECLNLLSQRLLGSNKFFFGDSPSSLDAYVFGHLAPLKFIRLPNCRLQONLKNLNDLNTFCSNILSL  
YFPNESIEGVSRPVSSTQPGSDLDNEPYKRRKQLLSVLVAVAAMLSALFTGIVAIEHVQEEEPVGSHEEEEEV  
>Q60UY8\_CAEBR [ (score: 1.40e-200, model: Metaxin1) Q60UY8\_CAEBR Putative  
uncharacterized protein CBG19767. ]  
MELHIWPSDFGLPTIDVSSLQFLACSKMCASPVRVVSARPPWRSPNGELPMVAQIDGNAKPVTDFEKFDILKCKGQDVV  
IDADLTTIERAQLDAFSCYLHNNLYPAVLHTFWADDLNYNTVTQYWYASHLHFPYNLYLEKRRKKALRMLGGKNDTEIL  
KDAPMALNTLSTKLGDNKFCCGKPTSLDALVFGYLAPELLRVPLPNDRLQVQLSACPNLVRVFVETVSSIYLPLSEDELKR  
QQSNRKMWQSRISKAKADKEAAKTTEEAEEAIPDEPPMRDAILFTIGALVLSVAFIHTGLIQVSVVEEIEA  
>Q4VX24\_HUMAN [ (score: 1.80e-197, model: Metaxin1) Q4VX24\_HUMAN Metaxin 1. ]  
MLLGGPPRSPRSGTSPKGPWSSTGHVQFGKSPQTPWPRRTRRSPEPAAPSGVGRGSTWTRRRDTPRRAGPTALSRYVGHLL  
MGRRPPSPEARGPVPRSSAASRARRSLASPGISPGLTATIGGAVAGGGPRQGRAEAHKEVFPQORVKGMAAPMELFCWS  
GGWGLPSVDLDSLAVLTYARFTGAPLKVHKISNPWQSPSGTLPALRTSHGEVIVSVPHKIITHLRKEVHTFWIDTKNYVEV  
TRKWYAEAMPFPLNFFLPGRMQRQYMERLQLLTGEHRPEDEEELEKELYREARECLTLLSQRLLGSQKFFFGDAPASLDAF  
VFSYLALLLQAKLPSGKLOVHLRGLHNLCAYCTHILSLYFPWDGAEVPPQROTPAGPETEEEEPYRRRNQILSVLAGLAAM  
VGYALLSGIVSIQRATPARAPGTRTLGMAEEDDEE  
>Q9BUU3\_HUMAN [ (score: 1.80e-197, model: Metaxin1) Q9BUU3\_HUMAN Metaxin 1. ]  
MLLGGPPRSPRSGTSPKGPWSSTGHVQFGKSPQTPWPRRTRRSPEPAAPSGVGRGSTWTRRRDSPRRAGPTALSRYVGHLL  
MGRRPPSPEARGPVPRSSAASRARRSLASPGISPGLTATIGGAVAGGGPRQGRAEAHKEVFPQORVKGMAAPMELFCWS  
GGWGLPSVDLDSLAVLTYARFTGAPLKVHKISNPWQSPSGTLPALRTSHGEVIVSVPHKIITHLRKEVHTFWIDTKNYVEV  
TRKWYAEAMPFPLNFFLPGRMQRQYMERLQLLTGEHRPEDEEELEKELYREARECLTLLSQRLLGSQKFFFGDAPASLDAF  
VFSYLALLLQAKLPSGKLOVHLRGLHNLCAYCTHILSLYFPWDGAEVPPQROTPAGPETEEEEPYRRRNQILSVLAGLAAM  
VGYALLSGIVSIQRATPARAPGTRTLGMAEEDDEE  
>MTX1\_CAEL [ (score: 2.80e-185, model: Metaxin1) MTX1\_CAEL Metaxin-1 homolog.  
]  
MELHIWPSDFGLPTIDVSSLQFLACSKMCASPVRVVIQSTRPWRSPSGELPMVAQTEGEAKPVTDFEKFDILKCKGQDVV  
IDADLTTIEKAQLDAFSCYLHNNLYPAVMHTFWTDELNYNTVTQYWYASHLHFPYNLYLEKRRKKALRLLAGKNDTEIL  
KEAFMALNTLSTKLGDNKFCCGKPTSLDALVFGYLAPELLRVPLPNDRLQVQLSACPNLVRVFVETVSSIYLPLGEDELKR  
QQANRKMWQSRISKAKADKEAAKTTEEAESLPEEPPMRDAILFTLGLTSLVFAIHTGLIQVSVVEEIESE  
>Q4VX23\_HUMAN [ (score: 8.10e-164, model: Metaxin1) Q4VX23\_HUMAN Metaxin 1  
(Fragment). ]

EGGQDGGAHGAVLLVRGLGAAVSGPGQPGRADLCQIYWCSTEGTQDQOPLAEPFRYPVSLGGTLPALRTSHGEVISVPHK  
IITHLRKEKYNADYDLSARQGADTLAFMSLLEEKLLPVLVHTFWIDTKNYVEVTRKWYAEAMPFPLNFFLPGRMQRQYME  
RLQLLTGEHRPEDEEELEKELYREARECLTLLSQRSGKFFFGDAPASLDAFVFSYLALLLQAKLPSGKLVHLRGLHN  
LCAYCTHILSLYFPWDGAEVPPQRQTPAGPETEEEEPYRRRNQILSVLAGLAAMVGYALLSGIVSIQRATPARAPG  
>Q5F3K9\_CHICK [ (score: 1.10e-152, model: Metaxin1) Q5F3K9\_CHICK Putative  
uncharacterized protein. ]  
MAAPMELSCWGGDWGLPSLHPESLTVMAYAKFSGAPLTVNTINNSWSTPKDVPVLISETVISQPAKILNFLRKQRYNAD  
YELSAKQGADTLAYIALLEEKLLPALLHTFWVEAENYCSVTKPWFASRIPFPLSLYLP GKMSREALNRILLTRGGPPLYS  
LTEVEAQIYRDAKECLNLLSKRLGTSQFFFGNTPTTLDADFVFGFLAPVYKVCFPRVQLQEHKQLTNLCRFCDLITCYF  
KLTITDG  
>Q3KPT9\_XENLA [ (score: 8.50e-136, model: Metaxin1) Q3KPT9\_XENLA LOC407751  
protein. ]  
MELRCWGSWGLPSVHPECLVVLAYARFAGAPLKVTPVDYTWASPKGTVPFLTSAGEDTHQAPANILNFFRKQKYNADYVL  
SAKEGSDTLAYIALLEEKLLPAVLHTFWVDTENYCNVTRPWPYASHTPFPLNYYLP GKMSRDALDRILVTRGQPPYLSLSE  
VEAQIYKDAKECLNLFNRLGTAQYFFGSTPTSLDAFVFGFLAPLYKAHLHKVNLQOHLKQLSNLCHFCDHILSAYFVSD  
DAGTSAAGQEAIDANLQKLTQLVNKESNLIKMDNLRSPQNRPOKLSLTKPVGGAENSHSSDLLSH  
>Q6QIT1\_XENLA [ (score: 3.50e-134, model: Metaxin1) Q6QIT1\_XENLA Metaxin 3. ]  
MMELRCWGSWGLPSVHPECLVVLAYARFAGAPLKVTPVDYTWASPKGTVPFLTSAGEDTHQAPANILNFFRKQKYNADYV  
LSAKEGSDTLAYIALLEEKLLPAVLHTFWVDTENYCNVTRPWPYASHTPFPLNYYLP GKMSRDALDRILVTRGQPPYLSL  
EVEAQIYKDAKECLNLFNRLGTAQYFFGSTPTSLDAFVFGFLAPLYKAHLHKVNLQOHLKQLSNLCHFCDHILSAYFVS  
DDAGTSAAGQEAIDANLQKLTQLVNKESNLIKMDNLRSPQNRPOKLSLTKPVGGAENSHSSDLLSH  
>Q4VBW0\_DANRE [ (score: 3.50e-127, model: Metaxin1) Q4VBW0\_DANRE Metaxin 3. ]  
MAEPIELLCWGGDWDLPSVQTDLSLTVLAYAKFAGAELTVKFVDWTRWRTITASVPOIHYEGTTVTEPTQILNFLRKQRFNA  
DFELTAKQGADTMAYIALLEEKLRPALLHTFWVDAENYANLTRPWFSTSHSPFPLNFFVPGRQASLALSRIILLTKAESPLL  
NITEVEGKIYSEAKECLNLLSHRLGNFNFFFGDTPSTLDAFVFGHIAPLIKAPLPSGQLQKHLNQLDNLCQFCNTILKNY  
FTDATAEKRMDCSPTVAHDFVDANLQKLTQLVNKESNLIKMDNLRSSPQHRPHRHEAKPSAPASDRNSTPA  
>Q6Y0L8\_DANRE [ (score: 7.30e-124, model: Metaxin1) Q6Y0L8\_DANRE Metaxin 3. ]  
MAEPIELLCWGGDWDLPSVQTDLSLTVLAYAKFAGAELTVKFVDWTRWRTITASVPOIHYEGTTVTEPTQILNFLRKQRFNA  
DFELTAKQGADTMAYIALLEEKLRPALLHTFWVDAENYANLTRPWFSTSHSLFPLNFFVPGRQASLALSRIILLTKAESPLL  
NITEVEGKIYSEAKECLNLLSHRLGNFNFFFGDTPSTLDAFVFGHIAPLIKAPLPSGQLQKHLNQLDNLCQFCNTILKNY  
LTDATAEKRMDCSPTVAHDPVDANLQKLTQLVNKESNLIKMDNLRSSPQHRPHRHEAKPSAPASDRNSTPA  
>Q7Z380\_HUMAN [ (score: 3.40e-101, model: Metaxin1) Q7Z380\_HUMAN Metaxin-3. ]  
AQDGGPLGTQLLGRRLGTPIGSQRVPGGDVPIILTTEDDMVSQPAKILNFLRKQKYNADYELSAKQGADTLAYIALLEE  
KLLPAVLHTFWVESDNYFTVTKPWFASQIPFPLSLILPGRMSK GALNRILLTRGQPPYHLREVEAQIYRDAKECLNLLS  
NRLGTSQFFFGDTPSTLDAYVFGFLAPLYKVRFPKVQLQEHKQLSNLCRFCDLSSYFRLSLGGISPAGQETVDANLQ  
KLTQLVNKESNLIKMDNLRQSPQLPPRKLPTLKLTPAEEENNSFQRLSP  
>Q17MF9\_AEDAE [ (score: 5.40e-63, model: Metaxin1) Q17MF9\_AEDAE Metaxin. ]  
MELFLYRGEWGLPTIDYDCARLLAYLKFAEAKITLNFNGNPFSSPTGMLPYLVTEEGKKIGGYNRITRITFLQSRGFDANAQ  
LEGQNYIVINGCIQYVFENLFPYFMYSLWGDPKNLDTRALYAKRIPFNFYCPKRYVLKTNELTVSLAGFALEDSIEL  
HDVKDLQLNAKKCINWISEKLGENRFFFGDTPSEIDAILYGYLSVLLKLTLPNNVLQNHVKQCSNLVKFVERITTIYFAR  
EGFTSASSNSSSSSSSSNDSSKEKPEQEQKFYDGTQKSDSDTPYERRKRYVVSIGIFATIAMVSYALLSGILSISQHDHGGG  
GFISYDEPEYDDEE  
>Q4RUS1\_TETNG [ (score: 1.30e-52, model: Metaxin1) Q4RUS1\_TETNG Chromosome 12  
SCAF14993, whole genome shotgun sequence. ]  
MCSFKAYAKFSGAKVTVSPIDWTWRTLTGEPARHASTHTDHCWRSSSTRFNTGSKNNTDLLNTVNLOQQSRSCLVRFNAD  
YELSAREGADTMAYIALIDEKLRPALLHTFWVDAENYVNLTRPWFASRSPFPLNLVVPGRQANAAF SRILLTKGEAPLQR  
ITEVEAKIYSEAKECLNLLSYRLGSA DFFFGKSALPSSPLQRHLTQLENITRFCD SILALYFSPDRPGSPQVPDTKDAN  
LQKLTQLVNKESNLIKVLLLRYSHTCNSNRFCVLLSVFQMDNLRSSPQHKSHRADLRASLAAGKSSSTPA  
>MTX1\_DROME [ (score: 2.30e-41, model: Metaxin1) MTX1\_DROME Metaxin-1 homolog. ]  
MEMQLGAMLYVYKGEYGLPSIDFECLRALCLLRFTRCPMDVQTSNPLRSAGKLPYLQIGNQKFAGYRQIKRVL DLEGY  
PIDAHLSTKQKHLSTAYANWVFTNLHAYYHYFLFGEPHNFDTTTRGLYAKRTPFPFNFYYPSSYQREACDVQVMAGFDV  
NDKLDKHEGDYLVNNAKVVNLLSRKLGKRVWFFGDYSEFDAIVYSYLAIIFKIALPNNPLQNHKGCQNLVNF INRIT  
KDIFRIEGYSSVKLTKTPSGTEASLTASERKFLDSELNTKIVAGVGAVLAMGAFAAWRGIYNQLTTRSSSTDYDGDYEDD  
EMEEGLD

>Q295J4\_DROPS [ (score: 7.50e-35, model: Metaxin1) Q295J4\_DROPS GA21755-PA (Fragment). ]  
MDIQLGAMLHVYKGEWGLPTIDFECLRALCLLRFTTRCPMDVETNANPLRSGAGKLPYLQIGNDKFVGYEQIKRVLBLEGY  
PIDAHLNTRKQKHLSATYANWVFTNLHAYYHYFLYGEFPNFDKTTTRGLYAKRTPFPFNFYYPSTYQREACDVVQVMASFDV  
NDKLDKHESDYLVLNAKCKVNLRSRKLGRKVVFFGDTYSEFDAIVYSYLAIFKITLPLNPLQNHKIGSQNLVNFINRIT  
KDIFRNEGFSSIKPTKTANGTVDVNVTHSEHKFLESECSTKI IAGVGALLAMGAFAAWRGIYNQLTTRSSSTDYDGDIDYDD  
DAEEGLE

>Q5HYI7\_HUMAN [ (score: 1.10e-32, model: Metaxin1) Q5HYI7\_HUMAN Putative uncharacterized protein DKFZp313L052. ]  
MAAPLELSCWGGGGLPSVHSESLVVMAYAKFSGAPLKVNVIDNTWRGSKGDVPILTTEDDMVSQPAKILNFLRKQKYNA  
DYELSAKQGADTLAYIALLEEKLLPAVLHTFWVESDNFYFTVTKPWFAEQIPFPLSLILPGRMSQQILSSRAGTHMLRK

>Q7Q284\_ANOGA [ (score: 2.70e-15, model: Metaxin1) Q7Q284\_ANOGA ENSANGP00000014380 (Fragment). ]  
EMEIFVYRGEWGLPSIDYECRLLAYLKFSGAKVTNVFNNGNPFSSPNGMLPYMIADGKKIAGYGRIVEHLVAAGIGPPTA  
TDRAENINGYMQYVQENLHPYFMYMLWGDPKNVDTTRTVYAKRIPIPFNFYCPKRYVLRNTDITQSLVGFSLSDSIEFHD  
VAEFQHNAKTCLNVAARLEESRWFTGDRPTEVDALLYGYLSVLLKLTLPNNVLQNHIRQCPKLMQFVDRTTATYFAKEG  
FNS

>A1CES6\_ASPCL [ (score: 4.80e-13, model: Metaxin1) A1CES6\_ASPCL Mitochondrial import receptor subunit (Tom37), putative. ]  
MVLELHVWGPAPGLPSIDPQCLATIAFYSLVLPKDAWVLIASSDPSVSPTELPAKNGKAWVSRFRNIVDYLRQYSNGE  
WDLDEVLSGTDRADNIAFSSFIESRGQPLIDLISLYITSQNYDKTSPAYGAILQWPNQWIIPRLHSAKKRTEPLGLSS  
LDLQAMEDQRKREHSAVAAGQIPENLIQRPRDTSVGLLGKTAQQRNRFKLEALTAELFDPLEEMLGQKSYFFPGDKPATA  
DCLALGYLSLALVPDLPYPWLRDAMKIKAPNLSRYTERLRQHCHYGAVALVDVSHAFDGPSPATDAASPLPWLAPARATAV  
TVGSTLLNTLADATPILKNIRAHERLRQAAQSPDSGLSRVESHALSAYATGQKKDVLVSVAAVVGGVAALLGYMAHVGLL  
QISYGSDEEEWEEEEEEEEEEQOEGGIAGIPESLSATEFLNF

>Q6GPN0\_XENLA [ (score: 1.40e-12, model: Metaxin1) Q6GPN0\_XENLA LOC407750 protein. ]  
MSLVTDAFVSQIAAVEPWPENAAALYQPMKSEQVLLSDNASCLAVQAFKMCNLPVQVVCRAEAEMSPSGKVPFIHVGNO  
VISELGPVIVQFVKAKGHSLSDGLDEVQRAEMKAYMELVNNMLLTAELYIQWCDEATLEEITQPRYSYPYSWPLNYFLVFQ  
RKWEIKRKMKAIGWATKTLEQVFEDVDQCCQALSQRLGTQSYFFNKQPTELDALVFGHLFTILTTLTQNTDELQEKVKNS  
NLIAFCRRIEQHYPEDHDGSISSSMKLSKGPTLP

>Q6Q8B0\_XENLA [ (score: 1.70e-12, model: Metaxin1) Q6Q8B0\_XENLA Metaxin 2. ]  
MSLVTDAFVSQIAAVEPWPENAAALYQPMKSEQVLLSDNASCLAVQAFKMCNLPVQVVCRAEAEMSPSGKVPFIHVGNO  
VISELGPVIVQFVKAKGHSLSDGLDEVQRAEMKAYMELVNNMLLTAELYIQWCDEATLEEITQPRYSYPYSWPLNYFLVFQ  
RKWEIKRKMKAIGWATKTLEQVFEDVDQCCQALSQRLGTQSYFFNKQPTELDALVFGHLFTILTTLTQNTDELQEKVKNS  
NLIAFCRRIEQHYPEDHDGSISSSIKLSKGPTLP

>Q9UUA5\_SCHPO [ (score: 2.00e-12, model: Metaxin1) Q9UUA5\_SCHPO Metaxin; 1 predicted transmembrane helix; similar to S. cerevisiae YMR060C. ]  
MLQLFIYSPGLGQPTMDPGCLAALIYCALAVPKDEIEILRTANSGMSPHKLPLWDGHVWIGSLKNILYIKQKGYNLD  
NFDKQLANVMAFTSLLEGSVNDLWLEAFVNEENFVEAIRPAWSKALKFPHNYLTPNALQRQAKERLAQTLGIRDEEVS  
YEASRMPISHKWTNATRHRQALLRTQARRIRISSLARQVYGSLESLSISDSKFIKFKPTSLDCLFYAYLSFHAFHTNELPQ  
ATLRPCLQFNSPKLYAYLKSRETWFSDSNILSPLSIKQVOPENLLTIARLAWNNVTAKANDTRKSITKFSVPPERKLLW  
ARNGFFIFASAFSFWVVISNGIVVIETEDDEASFEVDDAKESIQEKEIDETTESKATHDSSETSSSKELPKEEEKESS  
SFDLQPLSAQDLLFSGFAEDEIMDEEFGYDDDDDEEFDLDDLDLEEEIV

>Q6GUH5\_XENTR [ (score: 3.00e-12, model: Metaxin1) Q6GUH5\_XENTR Metaxin 2. ]  
MSLVTDAFVSQIAAVEPWPENAAALYQPLKSEQVLLSDNASCLAVQAFKMCNLPVQVVCRAEAEMSPSGKVPFIHVGNO  
VISELGPVIVQFVKAKGHSLSDGLDEVQRAEMKAYMELVNNMLLTAELYIQWCDEATLEEITQPRYSFPYSWPLNYFLVFQ  
RKWEIKRKMKAIGWATKTLEQVFEDVDQCCQALSQRLGTQPYFFNKQPTELDALVFGHLFTILTTLTQNTDELQEKVKNS  
NLIAFCRRIEQHYPEDHDSSISSTKLSKGPTLP

>Q6WFZ4\_DANRE [ (score: 6.10e-12, model: Metaxin1) Q6WFZ4\_DANRE Metaxin 2. ]  
MSLAAEAFVSQIAAAEPWPENAAALYQPLKEDQILLSDSASSLAVQTFLRMCGLPVQVSCRANAEMSPSGKVPFIQVGNQ  
VVSELGPVIVQFTKAKGHSLSDGLDDVQRAEMKAYMELVNNMLLTAELYIQWCDDFTATEISRPRYSSPYSWPLNHILAYQ  
KQWEVRRKMNAIGWSGKSLEQVYEDVSQCCQALSQRLGTQPYFFNKQPTELDALVFGHLFTILTTLTQNTDELVEKVKSYS  
NLLSFCHRIEQAYFKEQEREGQSGSSRHSKGSPLP

>Q5B6M7\_EMENI [ (score: 2.40e-11, model: Metaxin1) Q5B6M7\_EMENI Putative uncharacterized protein. ]  
MVLELHIWGPGLPSIDAQCLATIAFYSLAVPKDSWVLVASSDPTVSPTHELPALKNGSTWVSRFRNIVDYLRQYSNGA  
WDLDRDLSALEKADSVAFSSVFVESHQAQLLDLSLYVTSQNYYNSTSPAYGAILQWPNQWILPPQLHATAKARTEPLGLSS  
LDLEATEEQQRKRDHSAAVAAGRIPQNLISRPRETVTNLLGKTPQOQHFRLEALTGELFVPLEELDDKTHLLGTTSSLD  
CLSVGYLSLALVPDLPLPWRDAMQRKAPRLSQYIERLRLELFGTVNVADAFNSGANSLLPWQAPERASFARVGTSLTSS  
LADSTPILKEIRMNNKLRETAECSSAGLSEVESKSLSEYARAQKDTLLSIATVIGGVAALIGYMAHIGVFSAPQEEKE  
EPEEYQVELPKSISANDFLGI  
>Q4WHX7\_ASPFU [ (score: 3.80e-11, model: Metaxin1) Q4WHX7\_ASPFU Mitochondrial import receptor subunit (Tom37), putative. ]  
MVLELHVWGPFAFSLPSIEAQCLAAIAYFSLAVPKDAWVLIASSDPSVSPTNELPALKNGTTWVSRFRNIVDYLRQYSNGA  
WDLDRDLSGIDRADNIAFSSVFVESRQPLLDLSLYVSSSENYNRTSPAYGAILQWPNQWIVPPRLRSAAKSRTEHLGLSS  
LDLEAAEDQRKREHSAAVAAGQIPKTLAQRPRDTSVSSLLGKSPQOQFKLEALTAELFEPLEEILGQKTYLVSDGDATSV  
DCLALGYLALILVDPDLPYSFLRNAMRTKAPRISAYTERLRQRCYGTGVGEVAHAFDETRRSVTDATPLPWQPAQRANLTT  
VCSTLLNTLADATPILKDIRSSERLRQAQSPDSGLSGIESRALSEYATGQKIDILVSIAAVAGGVAALVGYMVHVGFIE  
ISFGGEEGHWEEEGHAGEEEGGSEFALPELPTSVSATEFLGI  
>A1DFG3\_NEOFI [ (score: 4.80e-11, model: Metaxin1) A1DFG3\_NEOFI Mitochondrial import receptor subunit (Tom37), putative. ]  
MVLELHVWGPFAFSLPSIEAQCLAAIAYFSLAVPKDAWVLIASSDPSVSPTNELPAVKNGTWVSRFRNIVDYLRQYSNGA  
WDLDRDLSGIDRADNIAFSSVFVESRQPLLDLSLYVSSSENYNRTSPAYGAILQWPNQWIIIPRLRSAAKSRTEHLGLSS  
LDLQAEDQRKREHSAAVAAGQIPKNLVQRPRDTSVSSLLGKTPQOQFKLEALTAELFEPLEEILGQKTYLVSDGDATSV  
DCLALGYLALILVDPDLPYSFLRNAMQTKAPRISTYTERLRQRCYGTGVGEVAHAFDEARRSVTDATPLPWQPAQRANLAT  
VCSTLLNTLADATPILKDIRSSERLRQAQSPDSGLSGIESRALSEYASGQKIDMLVSIAAVAGGVAALIGYMVHVGFIE  
ISFGGEEGWEEEGQEGEEGGSEFALPELPTSVSATEFLGI  
>O64471\_ARATH [ (score: 8.50e-11, model: Metaxin1) O64471\_ARATH Expressed protein (At2g19080/T20K24.9) (Putative uncharacterized protein). ]  
MEGDQETNVYTLVARKPSFDLPTACPNCLPAYIYLKLAQLPFELAFNSTFPDSELPYFESDITYVAYNNEGGVIEKLLK  
DGIVNLDSQLQSLSDYLSLKALIVSWLEEALTYEIVWGTEGISTSKIYYSDLPWVISKVLFYKQTYLAKNRLGITKENAE  
QREKQIYKRASEAYEALSTRLGEQKFLFEDRPSLDAFLLSHILFIIQALPVTSLRCKLLEHSNLVRYAEKLFSEFLEA  
SSSSPSPPLHSFSSFPKSSKPKSKPKVEKTEEEKKFKKRARFFLAAQFLAVVIYVSVMMGGSSDELEYEDDD  
>Q5C360\_SCHJA [ (score: 9.30e-11, model: Metaxin1) Q5C360\_SCHJA SJCHGC05855 protein (Fragment). ]  
ILSAPDELLPCDPNCLLILCYIRLKEARINIKVCLPDHSSVGEFPVLNHDSDYHGIPVILTYLRKENYGLYDLSDETEG  
VQLCALISTIDRRLAPAVNWFLWADDSVYTKFTRKMYFGSLRFFQQLYIPHIWRNRQINKAKSSQLITCLKNMSESEVGE  
HLYSLAKLCITSLSYILGENTFFVGDRTAVDAYVFAFMWPLLMYESQHGSDSNWWDVDYKSSSTNYVQSGSH  
>Q1KKR5\_FUGRU [ (score: 1.30e-10, model: Metaxin1) Q1KKR5\_FUGRU Metaxin 2. ]  
MSLAAEAFVSQIAAAEPWPESATLYQPLKEDQVLLSDCASSLAVQTYLRMCLPVEVMYRANAEMYSPSGKIPFIHVGNQ  
VVSELGPIVQFTKAKGHSLSGDLDDVQRAEMKAYMELVNMLLTAELYIQWCDDATATGITRPRYSSPYSWPLSSFLAYQ  
KQWEVRRKMNAIGWGGKTLQVYEDVNQCCQALSQRLGTQPPFFNKQPTELDALVFGHLFTILTTRLTSTELAERIKSHS  
NLLSFCRRIEQTYFEDKSS  
>Q1T1H8\_MEDTR [ (score: 2.00e-10, model: Metaxin1) Q1T1H8\_MEDTR Glutathione S-transferase, C-terminal-like. ]  
MAEVYTLVVRKPCFGLPTGCPQCLSSLIYLNFSQIPFQDFHVNHPHSDKIPYIEVGDDYVAYNNEIEGIIIECLKKDVGV  
VDLDSEVSSLPDWISIKAILTTWLHDALTYELWVSGDSSANSIYYSDLPWPLGKILYSHKVRWVKLKHGITDDNAVVK  
EEIYERANSAYGALSPLLGEKNYLFDESRLSDAIFLAHGLVALQALPESSTLRKFSEHDNLVRYVHKCKTELKDGAGT  
SPPSAPSGRSQSTQRPKSKSIPKREKTKEEKTLLKRKGKYFVAAQLVAVVVFLTMLVTFDITEGEVEDVDAGEY  
>Q2UPU0\_ASPOR [ (score: 2.20e-10, model: Metaxin1) Q2UPU0\_ASPOR Translocase of outer mitochondrial membrane complex. ]  
MVLELHVWGPFAFSLPSIEAQCLATIAFYSLAVPKDAWVLIASSDPSVSPTCELPALRNGSTWVSRFRNIVDYLRQYSNGE  
WDLDAGLSGLRADNIGFSSVFVESRAHALVDLSLYVTSQNYYNQTSPAYGSILQWPNQWILPPKIHAAKARTDHLGLSS  
LDLQAIEDQRQREHSAAVAAGQIPPNFIRRPRDTSVSSLLGKTSQOQFKRLDALTGELFEPLEEILGDKVYLLTGENEGPS  
SLDCLAVGYLSLALVPELSFSLRDAMKSKAPRLTVYTERMRQOCYGLGAEVSHAYTPTNSGSSLPWRAPERARLTTLG  
NTLNFVNLADNTPILKDIRAQDRLRVAAESPDGSLSEPDSRKLALAKGQKIDILVNIAYAVGGIAALIGYMTYEGFFSAE  
IGDEYEEDDEFEPMPDIEPDSLQVQNMLAGL  
>MTX2\_PIG [ (score: 2.50e-10, model: Metaxin1) MTX2\_PIG Metaxin-2. ]



MSLVAAEFVVSQIAAAEPWPENATLYQQLKGEQILLSDNAASLAVQAFLOMCNLPKVVCRANAEMYSPSGKVPFIHVGNO  
VVSELGPIVQFVKAKGHSLSDGLDEVQKAEMKAYMELVNNMLLTAELYLQWCDEATVGEITHARYGSPYPWPLNHILAYQ  
KQWEVKRKMKAIGWGNKTLDOVLEDVDQCCQALSQRLGTQPYFFNKQPTELDALVFGHLYTILTTQLTNDELSEKVKVNS  
NLLAFCRRIEQHYFEDHSGSSSVRLS

>Q7SFC4\_NEUCR [ (score: 4.80e-10, model: Metaxin1) Q7SFC4\_NEUCR Predicted protein (Putative uncharacterized protein G17B7.090). ]

MTLELHVWGPFAFGLPSIDAELATVYFAQTLAADYLLVQSSPSAVPSHHPALYNPSTATWISGFDPVNYLSTLQPP  
SYHHPDVTTLPSRVYADSQAYKALLTSSAAPLLALSIVSSANYSETTRPAYSAILPFPLPWTEPLAVRAAMAARAHLG  
MSSLDTDAEMERLEREEREREAAAGVWQIPKALRKAVGGQNSGVKQQLSPEMKRRIKLEGLAAEVFVLDVGEVDFLEEDGE  
EEEEEEEEAKEGGARIKVTLETCKLAFAYLALMLLPEVPRPWLKEVLQKKYAGLCKFVLEYRRTFPDSDGKVLWADRES  
DPAVSACDSALSIVGRFVRAVIDDIPMLGREWSRWALRQRVAEENSAETQLVVRRSVGESERSLLL LAGAGLTLAINV  
AGLGIYWYRGRLLGAPLQWHRPLVGLGSFGAAGAMFAGLA

>MTX2\_HUMAN [ (score: 6.70e-10, model: Metaxin1) MTX2\_HUMAN Metaxin-2. ]

MSLVAAEFVVSQIAAAEPWPENATLYQQLKGEQILLSDNAASLAVQAFLOMCNLPKVVCRANAEMYSPSGKVPFIHVGNO  
VVSELGPIVQFVKAKGHSLSDGLEEVQKAEMKAYMELVNNMLLTAELYLQWCDEATVGEITHARYGSPYPWPLNHILAYQ  
KQWEVKRKMKAIGWKKTLDOVLEDVDQCCQALSQRLGTQPYFFNKQPTELDALVFGHLYTILTTQLTNDELSEKVKVNS  
NLLAFCRRIEQHYFEDRGGKGRLS

>Q8IZ68\_HUMAN [ (score: 6.70e-10, model: Metaxin1) Q8IZ68\_HUMAN Metaxin 2. ]

MYIAAEPWPENATLYQQLKGEQILLSDNAASLAVQAFLOMCNLPKVVCRANAEMYSPSGKVPFIHVGNOVVSELGPIVQ  
FVKAKGHSLSDGLEEVQKAEMKAYMELVNNMLLTAELYLQWCDEATVGEITHARYGSPYPWPLNHILAYQKQWEVKRKMKA  
AIGWKKTLDOVLEDVDQCCQALSQRLGTQPYFFNKQPTELDALVFGHLYTILTTQLTNDELSEKVKVNSNLLAFCRRIE  
QHYFEDRGGKGRLS

>Q5VRG1\_ORYSJ [ (score: 7.90e-10, model: Metaxin1) Q5VRG1\_ORYSJ Putative uncharacterized protein OSJNBa0033B09.11 (Putative uncharacterized protein P0680A03.32). ]

MWAGIGFPVYVMGFIDAAGRGEQTHKPSAFFSSRSSKESPLPAMASAAAAAAAEWEEAERKVLVARKAAAFGLPTACPT  
CLPVLLYLRLMCNVPFDIHVDSSFPDADHIPYVEFGECVAFNNEKGGVIEYLKEEKIVDLNSKHPSVSYSDVLSKAMVMT  
WLSDALQYELWLASDGSIPHDIFYSDLSWPIGKILYWKKTREVKQQLGITKLNAAEKEEEIYQKANAAYDALSTRLDQI  
FLFDNSPTDQVLDALFLGHALFVLNVLDPDTSVLRSCLOKYDNLVNFTKHLKVQLLEADSDSSATGLGSTDPSSSSTPRKRAS  
SGRSYKPKPRAKKERTEEEKFRKAKYFLATQLVAVLLFSLMGGADSSSELDDDEDGVDYED

>Q0DE86\_ORYSJ [ (score: 7.90e-10, model: Metaxin1) Q0DE86\_ORYSJ Os06g0168000 protein. ]

MASAAAAAAAEWEEAERKVLVARKAAAFGLPTACPTCLPVLLYLRLMCNVPFDIHVDSSFPDADHIPYVEFGECVAFNNEK  
GVIEYLKEEKIVDLNSKHPSVSYSDVLSKAMVMTWLSDALQYELWLASDGSIPHDIFYSDLSWPIGKILYWKKTREVKQ  
QLGITKLNAAEKEEEIYQKANAAYDALSTRLDQIFLFDNSPTDQVLDALFLGHALFVLNVLDPDTSVLRSCLOKYDNLVNFT  
KHLKVQLLEADSDSSATGLGSTDPSSSSTPRKRASSGRSYKPKPRAKKERTEEEKFRKAKYFLATQLVAVLLFSLMGG  
GADSSSELDDDEDGVDYED

>Q5U1Z9\_RAT [ (score: 9.10e-10, model: Metaxin1) Q5U1Z9\_RAT Metaxin 2. ]

MSLVAAEFVVSQIAATEPWPENATLYQQLRGEQILLSDNAASLAVQAFLOMCNLPKVVCRANAEMYSPSGKVPFIHVGNO  
VVSELGPIVQFVKAKGHSLSDGLDEVQKAEMKAYMELVNNMLLTAELYLQWCDEATVGEITLARYGSPYPWPLNLILTYQ  
KQCEVKRKMKAIGWGNKTLDOVLEDVDRCQALSQRLGTQPYFFDKQPTELDALVFGHLYTILTTQLTSDDELCEKVKVNS  
NLLAFCRRIEQDYFEDRGGKGRLS

>Q8C454\_MOUSE [ (score: 9.50e-10, model: Metaxin1) Q8C454\_MOUSE 12 days embryo spinal cord cDNA, RIKEN full-length enriched library, clone:C530040G04 product:METAXIN 2 homolog. ]

MSLVAAEFVVSQIAATEPWPENATLYQQLRGEQILLSDNAASLAVQAFLOMCNLPKVVCRANAEMYSPSGKVPFIHVGNO  
VVSELGPIVQFVKAKGHSLSDGLDEVQKAEMKAYMELVNNMLLTAELYLQWCDEATVGEITLARYGSPYPWPLNHILAYQ  
KQWEVKRKMKAIGWGNKTLDOVLEDVDQCCQALSQRLGTQPYFFNKQPTELDALVFGHLYTILTTQLTSDDELSEKVKVNS  
NLLAFCRRIEQHYFEDRGGKGRLS

>Q2M4G1\_MOUSE [ (score: 1.20e-09, model: Metaxin1) Q2M4G1\_MOUSE Metaxin 2. ]

MSLVAAEFVVSQIAATEPWPENATLYQQLRGEQILLSDNAASLAVQAFLOMCNLPKVVCRANAEMYSPSGKVPFIHVGNO  
VVSELGPIVQFVKAKGHSLSDGLDEVQKAEMKAYMELVNNMLLTAELYLQWCDEATVGEITLARYGSPYPWPLNHILAYQ  
KQWEVKRKMKAIGWGNKTLDOVLEDVDQCCQALSQRLGTQPYFFNKQPTELDALVFGHLYTILTTQLTSDDELSEKVKVNS  
NLLAFCRRIEQHYFEDRGGKGRLS

>Q3TI19\_MOUSE [ (score: 1.30e-09, model: Metaxin1) Q3TI19\_MOUSE TIB-55 BB88  
cdNA, RIKEN full-length enriched library, clone:I730049A07 product:metaxin 2,  
full insert sequence. ]  
MSLVAAEFVVSQIAATEPWPENATLYQQLRGEQILLSDNAASLAVQAFLOMCNLPVKVVCRAEYMSPSGKVPFIHVGNQ  
VVSELGPIVQFVKAKGHSLSDGLDEVQKAEMKAYMELVNNMLLTAELYLQWCDEATVGEITTIARYGSPYPWPLNHILAYQ  
KQWEVKRKMKAIGWGNKTLDOVLEDVDQCCQALSQRLGTQPYFFNKQPTELDALVFGHLYAILTTQLTSEDELSEKVKVNS  
NLLAFCCRRIEQHYFEDWGKGRLS

>A2AT31\_MOUSE [ (score: 1.40e-09, model: Metaxin1) A2AT31\_MOUSE Metaxin 2. ]  
MSLVAAEFVVSQIAATEPWPENATLYQQLRGEQILLSDNAASLAVQAFLOMCNLPVKVVCRAEYMSPSGKVPFIHVGNQ  
VVSELGPIVQFVKAKGHSLSDGLDEVQKAEMKAYMELVNNMLLTAELYLQWCDEATVGEITTIARYGSPYPWPLNHILAYQ  
KQWEVKRKMKAIGWGNKTLDOVLEDVDQCCQALSQRLGTQPYFFNKQPTELDALVFGHLYTILTTQLTSEDELSEKVKVNS  
NLLAFCCRRIEQHYFEDWGKGRLS

>Q3TI40\_MOUSE [ (score: 1.50e-09, model: Metaxin1) Q3TI40\_MOUSE TIB-55 BB88  
cdNA, RIKEN full-length enriched library, clone:I730047J24 product:metaxin 2,  
full insert sequence. ]  
MSLVAAEFVVSQIAATEPWPENATLYQQLRGEQILLSDNAASLAVQAFLOMCNLPVKVVCRAEYMSPSGKVPFIHVGNQ  
VVSELGPIVQFVKAKGHSLSDGLDEVQKAEMKAYMELVNNMLLTAELYLRWCDEATVGEITTIARYGSPYPWPLNHILAYQ  
KQWEVKRKMKAIGWGNKTLDOVLEDVDQCCQALSQRLGTQPYFFNKQPTELDALVFGHLYTILTTQLTSEDELSEKVKVNS  
NLLAFCCRRIEQHYFEDWGKGRLS

>Q1DNN1\_COCIM [ (score: 1.60e-09, model: Metaxin1) Q1DNN1\_COCIM Putative  
uncharacterized protein. ]  
MVLELHTWGPAGLPSIDAQCLATIAYFALALPTNGSPEWVLPVSDPKIVPTNELPAVWTGSRWISGFRNIVAFKQYS  
DGEWDLDRWMPGGEQADCVAFSSFLELHGQSLIDLISLVSSDNYTSVTSPAYGTLLOWPNQWIIPPQVRSQAKARTEHLG  
LSSLDLDAVEEERQQRDINSVAAGQIPRSLATRPRQTVSGLLGKPSQKSRIRLEGLTASFVEPLQEMLEKKGYLLSDNI  
PSSLDCLALGYLSLAMVPELPPFWLKDDIQAQAPRLGAYVKKLGARCFGGSVDAAVLSGIQAGTGSRLPWQIPERISLG  
GIGLRIFEGIADSIPVVKDIRLSRRLKQMGQDRSLESEVLAALADGYKREALTSAATVALGLGMFMFYLFYTAGPLQVSFA  
TEDDHSSSSAENEEAGDDSEEKGEKGSSEKPFDLGEVGSMLGL

>A5B6D4\_VITVI [ (score: 3.50e-09, model: Metaxin1) A5B6D4\_VITVI Putative  
uncharacterized protein. ]  
MDELDNQKLTLVARKPCFGLPTACPSCLPVYIYLRFAQVPPFDLSFNLIHPDSDQIPYIESGAYVAYNNEKGGVLESKED  
GIIDLSQLHAIPWLSMKVMISTWLEEAIMYELWVCSGDTSAKKIYSDLPWPIGKILYFKQIHAVKQLLGITKDNAER  
REEEIHRRTIAYGALSTRLGEQTFFFENRPSGVDALFLGHALFTLQALPDTSVLRSKLEHSNLVQYAEKLEKTEFMEAG  
SSSSSVPRFPAEPSSSTSRRGPSNWSKAKSKPKREKTEEEKTFRRRAKYFLVTQLVAVLVFLSLLGVSGGDNEVDLDE  
DDDNY

>Q7Q415\_ANOGA [ (score: 6.30e-09, model: Metaxin1) Q7Q415\_ANOGA  
ENSANGP00000010484. ]  
MKDWPRDAVLYQPYEEEQILLAENASCLAVRTYLKMLNLPVALEQRANAEMSPGGKRTKLPVLRVENFIYA EFDHIVTF  
LEKNFNKSL SAPLTPEEKQMRSTNCLVEHLFTTAEQYVSWIDPEVRNTVTKKRNGCVFPFPLNHVQNRKESAVRRQLR  
MADYLHEGIDTIMGEVDHLCQDLSSRLGDKRYFFGDSPTELDALVFGHLYSIFTMMLPNNVLALTIHKYSNLNQFCKNID  
ETYFSVKGK

>Q17FN8\_AEDAE [ (score: 1.30e-08, model: Metaxin1) Q17FN8\_AEDAE Metaxin. ]  
MSAITSEYLKNETIASQPWPOQAHLYQPYEEEQILLAENASCLAVRTYLTMLNLPFVVDQRANAEMSPGGKRTKLPVLR  
VENYTYAEFEHILSFVELKGLSLTKQLTPDQKDDMRAHLCLVEQIFTNAEQYISWVDPEVLHKVTRQRNGCVYFPPLNHI  
QNWRKQMAVRRQLGVADFLNITLDEVVEKVEKLCSTLSMQLGDKKYFYGDEPTELDALVFGHLFSIFTMTLPNNVLAVTI  
NQFKNLTKFCKNIEEKYFKKVAGGR

>Q629F8\_CAEBR [ (score: 1.60e-08, model: Metaxin1) Q629F8\_CAEBR Putative  
uncharacterized protein CBG00033. ]  
MNAAQDWEDVSLFTPYLNDQALMYDFADCLAVQTFRLRMTSLPFNVRQRPNVDFISP DGVVPLLKINKTLITGFNAIVDFV  
HKKGVTLTSHLSETQVADMRANISMI EHLTTVEKFVLWKHDETYDKVTRLRYGSVYHWPLSTVLPFLKRRSVLEELADK  
DWDAKTMDEVEGEQADKVFRLSAQLGTQKYLTDGLPTEADALLFGHMYTLITVRLPLTNITNILKKYTNLIEFTKRVEQQ  
YFKQ

>Q55NT1\_CRYNE [ (score: 6.70e-08, model: Metaxin1) Q55NT1\_CRYNE Putative  
uncharacterized protein. ]  
MSRPSIILHATPPLHPLPASDAESLYYAALLQLAAPDGWALTRGDWGDNGGKLPFITHLAHPVPPAHLSSLSPSFSDPDEE  
LEDGEKLDAA CWKAYIEGNVVDIVNHTYYSLPPNYPSTVAKSQFAGLPFPMNQYIPQRIRSIKSRLEFVGLWGLGGLNV

GDAEDEDKRKQEEQFIIGPGGTTAPRAWTGWRSGQETDKRRRKWGEQOLEQKIKAI FDSLARRLGKKAYFFGERPTTVDL  
ALFAQLAFVLTPTLPNLLPNILRSSYPSLVGHHDRLLERLFSWSTVPMASVQTPARTTWGETFASWLPGPSRSRTQPS  
SSSSTDSKENS KGGSPSKPKTDKQKAFERGRWLWFAGAAVSMVTYLFVSGVIAFEFGDEEDEDWVAYEEDGEGEVGETT  
VLDYEEEE

>Q2HCV5\_CHAGB [ (score: 7.40e-08, model: Metaxin1) Q2HCV5\_CHAGB Putative uncharacterized protein. ]

MDAGSLHQTNRLEIRICRADLSQSGSVTQLTQLLQFAMVLQLHVWGPAGLPSIDAECIAVIAYLAQTASPADYQLVQSS  
PSAVPTQHLPALHDPSTSTWTSQFSSITTYLAAHPRSSQPITPTPPKQPQPTPTSTPTTTANATAYTAFLLTHAAPLLS  
LTLYVSSANYAATTRPAYSAVLFPPLPWTEPPAVRAAHARRAAPLGLSGLD TDAVRARERAERERAVAEGWVTVPEGLGK  
GVGGGGGGKGVAAALSPEQKMRIRLEGVASEVLDVLEGEVEWEGQEVGVRCLAFGYLALMLVPEVPRPWLEVMESRYPEL  
CKFVRGFRGDVFPKERALPWAEQQSASAVAVGMRVFRGVLGEVPLVGERWSQWWTARKRREVLASKGVKSEPSGDLMLF  
LGAGLGLTAMGAGVFFYRGLPPFAGAAVQVWRKPMVSLSSFGAAGAMFSGALYCID

>Q5KC66\_CRYNE [ (score: 7.70e-08, model: Metaxin1) Q5KC66\_CRYNE Expressed protein. ]

MSRPSIILHATPPLHPLPASDAESLYYAALLQLAAPDGWALTRGDWGDNGGKLPFITHLAHPVPPAHLSSLPSFSDPDEE  
LEDGEKLDAAWKAYIEGNVVDIVNHTYYSLPNYPSTVAKSQFAGLPFFMNQYIPQIRISIVKSRLEFVGLWGLGGLNV  
GDAEDEDKRKQEEQFIIGPGGTTAPRAWTGWRSGQETDKRRRKWGEQOLEQKIKAI FDFLARRLGKKAYFFGERPTTVDL  
ALFAQLAFVLTPTLPNLLPNILRSSYPSLVGHHDRLLERLFSWSTVPMASVQTPARTTWGETFASWLPGPSRSRTQPS  
SSSSTDSKENS KGGSPSKPKTDKQKAFERGRWLWFAGAAVSMVTYLFVSGVIAFEFGDEEDEDWVAYEEDGEGEVGETT  
VLDYEEEE

>A2Y9S6\_ORYSI [ (score: 1.20e-07, model: Metaxin1) A2Y9S6\_ORYSI Putative uncharacterized protein. ]

MASAAAAAAEWEEAERKVLVARKAAFGGLPTACPTCLPVLLYLRCMNVPFDIHVDSSFPDADHIPYVEFGECVAFNNEKGG  
VIEYLKEEKIVDLNSKHPSVSYSDVLSKAMVMTWLS DALQYELWLASDGSIPHDYFSDLSWPIGKILYWKKTREVKQQ  
LGITKLNAAEKEEEIYQKANAAYDALSTR LGDQIFLFDNSPTDVDALFLGHALFVLNVLPDTSVLRSC LQKYDNLVNF TK  
HLKVQLLEADSDSSATGLGSTDPSSSSTPRKRASSGRRFSWA

>A3B8S3\_ORYSJ [ (score: 1.20e-07, model: Metaxin1) A3B8S3\_ORYSJ Putative uncharacterized protein. ]

MASAAAAAAEWEEAERKVLVARKAAFGGLPTACPTCLPVLLYLRCMNVPFDIHVDSSFPDADHIPYVEFGECVAFNNEKGG  
GVIEYLKEEKIVDLNSKHPSVSYSDVLSKAMVMTWLS DALQYELWLASDGSIPHDYFSDLSWPIGKILYWKKTREVKQQ  
QLGITKLNAAEKEEEIYQKANAAYDALSTR LGDQIFLFDNSPTDVDALFLGHALFVLNVLPDTSVLRSC LQKYDNLVNF TK  
KHLKVQLLEADSDSSATGLGSTDPSSSSTPRKRASSGRRFSWA

>A4RLK1\_MAGGR [ (score: 2.90e-07, model: Metaxin1) A4RLK1\_MAGGR Putative uncharacterized protein. ]

MGLLRLYVWGPAGLPSLDAECLAVIAYFQQNVRPGDYEIVASSPSAVPTTSYQGILDMLTSHPSSKTQNSSPDPSAAAR  
IAHLTAQASPLLALS LYVSSANYAATTRPALSSVLPFLGWTEAPARRRMLARRADHLGLSDLD TADPDDPQNLSVADS  
TRKSFIPARLQPRATKTISSALTPEAKARFRLDAAA AVLDVVA AAPPTAASPPSAYDCLAFGYLALMTVPDLPRPFLEE  
FVNARHPALRDFVTDARIAWFSSPSSLPWSSDRTLTADSPLCVASRLAAGCVAALPGMGMTAWSAWAHGRRSGRLAGR  
TTGRRGSMEHGEVWWTGLGLVLSASVVATAVMLLQDVVTTTHRFGAPLQVFERVRRVGGGLWAVGSAGAVLGGAGRQLGAGO  
FAR

>Q4PHX6\_USTMA [ (score: 1.30e-06, model: Metaxin1) Q4PHX6\_USTMA Putative uncharacterized protein. ]

MSTYASTSSGSAPDGPRTLRLHVWGTSPPTLPTLDPASLYAASLLRATFAHKGDVQLQLASASTSLARVPLLQVLEGNNET  
VELIDSVEAIKSFCTAVGLDSALVSDEELEAKHTALHAFVDDHLLDLILHSLFSLPANFRTVTASAYSSVGGIEAPASSL  
AKLASLPLRFQPSIPSR LRNVVETRLTAVGLWGLGKKEALAQSGEADDLAARAGIIPARKOGLGQSAKQAVHDEFERSKL  
VSKWREVLVDIDAALGGGMYLFGGSKVSSLD AHVFGYLAPLLFASP KMPVDILPRLVKTSYPRLAHYLT KMNQQLFP GPD  
ELSLWATHTEVLSSPPTVPTSSSTPLSGLLSYIWPFSAPTTSNKASSPSTTDSTPAAAAADSIPRTTPTATRQQOQRQSR  
PSASPEDRRRLRGRALWVCSALIGLVGYTFASGIVSVRFVDSDELMEEEEEEEEEEDGWQVQSEDVLDDELDEME LSDQD  
DDDIKPLVRRVNLILVLSFVNGVAGCERGPCADIDV FASSTHTSFAVCHCNVIQPTTNLTQHDPSTSCGIATSSNPF CV  
RSCLTTSDDTCAQNYHIVTGTFNRSRSLFVLT YDVLNSKLSILHSIRAE GPHQYLALGVSSRQQQTVYATTWGTSPSALS AW  
HVSPTDYSLSFGNREITATGSYVHVQPPPYLTRSAPGFGSLPGVARWLGSAGGPTGELHTLDPETGRIETRVKEMIFLA  
GGEKQLATADKTRKALRYGAHSFDCSASSSSGQGVAYVADLGANAIQAYRFASLDHLYTIVSKREEDGPRHVIPHPEWP  
LVFTVTEHSNYVDAYQVPPYDSDIKEGARHVAEADLLTPQQAASGRSNWRGDTLRFSSDLRYIYATTRGK TMSNKGLLVA  
LRLTITPSSSGIHVDLREVARFHTRTSGGKANAIELAPTRIMDGLDHMVLTDDEQGWIDVVAFDLNEPSFHVKASTQLPP  
IQHHHQPPQGASHAIWLL

>Q9HE00\_SCHPO [ (score: 2.40e-06, model: Metaxin1) Q9HE00\_SCHPO SPAC589.04 protein. ]  
MGGLTKFSSYFHSIFSRFPLITFSNPYPGENEDYKTKTVMYLTMWNSDLNSEALDVNSLQWQWAKLNDPSIVFLNVSNH  
ASPDEKVPFIQIESRKLVLNPSLLQYFLKDESTLQOISPWMSLLINQVETAILLTMYLNDNENFSEIQKKWLPNMSWPLNI  
IKSIGLPSQIKRKICLQLNESTLDFDAILEDASKAFSALSSELLGSDKWFFNNESSPSFLDVSLFAHAEIINHLPLKNDQLK  
VVLGTHKNLTDLTTTRVRTLAGYTSAGPIALR  
>Q0C9X8\_ASPTN [ (score: 2.80e-06, model: Metaxin1) Q0C9X8\_ASPTN Putative uncharacterized protein. ]  
MVLELHIWGPFAFSLPSIDAQCLATIAYFSLVVPKDAWVLVASSDPTVSPTSASFSTSYATPSLTTTPDELPAKNGSTWVS  
RFRNIVDYLRQYSHGEWLDLHKPTSTGDSQRRADSIASFLESRAQPLLDLSLYVTSQNYAQATAPALAALLHWPQW  
LVPPRLHAAAKHRTAPLGLSALDLAAMDEQRTDLSAAVAAGHLPEAFHLNRALTAARDASAASAALARSQFRLDALTAD  
LFAPLEALLAGGAYLLTDEPDGPTTLDCLATGYLALALVPDAAGATSRRERYENEKDGITPIV  
>Q0V5D9\_PHANO [ (score: 3.90e-06, model: Metaxin1) Q0V5D9\_PHANO Putative uncharacterized protein. ]  
MLELHTWGPFAFGLPSIDPECIATIAYCRRVIPNGFWSLVADYDTTVGATGTPKYPALSIFIAFLQSTAAPLIDLLLYVSA  
ENYNTTSSAYTALLPWFANYTIPPKRRDIARSRTGHMGLSSLDVDTTGEAFAPGRGTASSDYEAAKRAAGIPTGGQPS  
ALRMGRGKIGGFLGTPAYAARFRDLSNELDPVADLLGKTDFLLTEDRISLDCLAFLGYLSLLFYPAVPQAWVKETI  
QTKFPRIASYIRRLRKDIFCDEDIKPADVWTISSGPPQASSGMLLPWQPRSQGMSSALDGAIEAGNLPLVSWFTQGTS  
VVHMDYPLSSKNMRSSMPSVPVINTLLGATAAATIGFASLAIHRRSPREGALIFWALRPSTGFGEAGDILSIFANQMP  
GAYSQF  
>Q8T4F2\_DROME [ (score: 6.00e-06, model: Metaxin1) Q8T4F2\_DROME AT01806p (CG5662-PA). ]  
MELEQNLTAAALMQSSAEEGKSEEAWPADAHLHQPAAEQLLLPERSSSCLAVKTFLRMCNLPFTEHISDNAEFMSPGGRLT  
HLPLLRGVPKTFAEFEPIVAQVEAVQGGNCLDSWMSQDQDNIRCLVSYVENVFTLAEIHMSFVDEVNYQLYTATRCAA  
AHPWPLSTIRRFKQKDAQKILKVYRWQDLNDQVIEVSI CADALIAELEEDQAKSYFGGSRPCKLDALVFGHVVAIMT  
TKLPNMELAAVLATYPRLLAHCRRIDQSLFDGKLLTSAVEEQEDEMELEKIE  
>Q9VW58\_DROME [ (score: 9.90e-06, model: Metaxin1) Q9VW58\_DROME CG8004-PA (LD33138p). ]  
MTSQYLSQLITADKLSAEPWPEDATLYQPYEAEQILLPENASCLAVKAYLKM CNLPFLIRSCANAHEMSPGGRM TKLPFI  
RAGAFIFAEFEPIVNFVEQKELAIQSWQDEDEKADMRTYVSLVENIFTMAELYISFKNERVYKEVTAPRNGVVPWPLNH  
MONEYKRRNALRLLKVYQWDDLIDSDVIDKVAKCETLEYKLEKESPETPFYGDQPCELDAIAFGHLFSILTTTLPNMAL  
AQTQVKFQHLVEFCRFVDEKYFQTRCLPN  
>Q6CII7\_KLULA [ (score: 1.10e-05, model: Metaxin1) Q6CII7\_KLULA Kluveromyces lactis strain NRRL Y-1140 chromosome F of strain NRRL Y-1140 of Kluveromyces lactis. ]  
MSGSKVLHLWGLNGEPSLVSPECIALCWLLKGGYVASGTVQVVYSNNTDLSPTGELPILIDTSAKITVGLYSIIIEHLVHD  
NDVKLLSSALLQFISEELKTCTMYQLYLNPVNYEYTSKIYSYLLHWPFWYNTPLSARSRARELCR DIMVTIPEDEENES  
TSNHQDELSEKATELAQSKVFKITRDSKRQQTKKLQELKNNSRFTTKLDNVL TNWESARQSLASAVLPADLV LVAHLKVQ  
MALPQGDLLRSHLRNQYPSLYDKVNELEKYDNVSPVNRDPTFSESGNVVTSTCYFLRTFV  
>MTX2\_CAEEEL [ (score: 3.60e-05, model: Metaxin1) MTX2\_CAEEEL Metaxin-2 homolog. ]  
MSSSGVITQLVTDALSMNAAQDWEDVSLFTPYLNDQALMYDFADCLAVQTFLRMTSLPFNVRQRPNVDFISPDGVPPLK  
INKTLITGFNAIVDFVHKKGVTLTSHLSETQVADMRIANISMIEHLLTTVEKFVLWNHDETYDKVTKLRYGVSVYHWPLSSV  
LPFVKRRKILEELSDKDWDTKTMDVEGQADKVFRAQSAQLGSQKYLTDLPTEADALLFGHMYTLITVR  
>Q1ZZ46\_ASPNG [ (score: 3.70e-05, model: Metaxin1) Q1ZZ46\_ASPNG Putative uncharacterized protein. ]  
MVLELHIWGPFAFSLPSIDAQCLAAITYLSLTVPKDAWVLVASSDPSVSPTELPALRNGSTWVSRFRNIVDYLRQYSNGD  
WLDLQGLSGIEKADNTAFSAFLESRAQSLLDLSLYVTSQNYNCTSPSYGAILQWPNQWILPPKLHSAAKTRTEHLGLSS  
LDIQAIEDQRKRHSAVAAGQIPKNLIPQPRDTSVSSLLGKTAQQG  
>Q6C8L9\_YARLI [ (score: 4.50e-05, model: Metaxin1) Q6C8L9\_YARLI Yarrowia lipolytica chromosome D of strain CLIB122 of Yarrowia lipolytica. ]  
MFRLHVWGPVSTSLTFSAPCLATIYWMQLCDIDFTVVQSSNEGLAGELPCLTSEKKIGGAESIIRYLKSLGHNLADALT  
SDEQIKNTALLAYMSSLQITITEYCLFVDEEAYQKVTRPMFNEFMPFLMQYNVSVRLREQAKDRCCAAGIDTATPSWAVSA  
TKMASESLTNPKPSMGKLYDQSVEREKQKDAKAVSKTVFRLLNSATEIYTDMMDTATANVAKGSLFSTVSTSDVFLCAH  
LQLQMLPALPDCAVAGLLKSKFPALLQYEDVFVEKIGNKDLKVEGPLGKDAPLWIYHLKQILGWY

>SAM37\_YEAST [ (score: 3.70e-04, model: Metaxin1) SAM37\_YEAST Sorting assembly machinery 37 kDa subunit (Mitochondrial 37 kDa outer membrane protein) (MAS37 protein). ]  
MVKGSVHLWKGDKGKASLISVDSIALVWFIKLCCTSEEAKSMVAGLQIVFSNNTDLSSDGKLPVLILDNGTKVSGYVNIQVQF  
LHKNICTSKYEKGTDYEDDLAIVRKKDRLLLEYSLLNYVDVEISRLTDYQLFLNFKNYNEYTKKLFKSKLLYFPMWYNTPLQ  
LRSQARENCEEIIIGSLTLEDDEEFVESKAMESASQLAQSKTFKIAHKNKIKGKQELQOVKYNLQFDNRLQSCVSNWLAAR  
KKLDDSVILSSDLLFLANLYVQLGLPDGNRIRSKLEQTFGSELLNSMSNKIDDFVHRPSNNLEQRDPQFREQGNVMSLY  
NLACKYI  
>A2QRI9\_ASPNG [ (score: 4.40e-04, model: Metaxin1) A2QRI9\_ASPNG Function: human Metaxin participates in preprotein import into mitochondria. ]  
MSVQMALPRPQVGLIVPRPQAGFGNGCASLLRQVLPLEAKVDQDAHHEWNDERLERVGPATDSNERKVSRRWDGFORRG  
RDEGQPGVAEGLLGTTRMLQOVITNPQEINWARTDLFLCSSNTNKPSTSRLLAGPVANSPALSNWPRLPPCLLNPLR  
SPLHPSINPMTPEYRDDPGQTPDNVSTVSRARDFFSVPTPIKRIFDRFPLVTYPSNDLPHSAWSDKRGNRLYVFTDAASA  
RHGRPSFNPQCLKWQAYLRFVGDVDPVIPSNNHASPSGALPFLIPAHPINNNAPIPSSKLOKWAIEQVHCEEEQQLDLRF  
EVYASLLDHRIRNAWLYTLYLDPEEFEAVARPLYVNPSSSTNSAVRTALALQLOQAARTEILKTSSYIDVGALEAEANDAF  
EALSTLLGDNQHFDRPNPGLFDASVFAYTHLILEEKLGRNRRLGQLLRQHENLVQHRDRLLKFF  
>A3LTE5\_PICST [ (score: 5.90e-04, model: Metaxin1) A3LTE5\_PICST Predicted protein. ]  
MIQLHVWGCSTEISVISPECLAASWLLTDSLNTSEEYIEVTSSTNVSDIGKLPVLTTAERKLGQFEEISKYILETYGD  
TNFVSKELSTHNQVLNKALIAKLQYKVEYIHQYNMFVNSRNYEKYTTKLFQKYLFPMMYNQPLKLHQNAQEQQVQLLGLN  
KNKTGFFDFSGSVNNSEIAETEYINDENEEQDEVALSALHERQLVAKSKEKSLRESKNSLKCLHLLNDYLDYFSKLYEK  
LNGNKNSYGFIFDQKRASSCEILLCAVYVSLTYEDLPDRFIYNYLKIKRPDFTEFIATCTQRWNTQLQIEDAVRGPENEE  
TPSLWNEVKYQTGIVHY  
>Q0D0L7\_ASPTN [ (score: 6.20e-04, model: Metaxin1) Q0D0L7\_ASPTN Putative uncharacterized protein. ]  
MTTDSRDPSGQAPANGTVSRARDYFVSPAPIKRFFDHFPVTPPNDLPQRALSSRRGNRLFVFTDAAGARHGSPSFNPQ  
CLKWQAYLRFVGIQFVDPVPSNNHASPTGSLPFLHPALPIGTNAPIPSHKLQKWAIEQVHCEEEQQLNLRFEVYASLLDHR  
IRNAWLYALYLDNENFGAVARRLYVDATTTNPLVRAALAFELRQAAQTELKTSQYVDASALEAEAGEAFEALSTLLGDD  
QHFFARPNGPLFDASVFAYTHLILDDKMGWKQNRGLGQLLKQHTNLVQHRERLLSFF  
>A5DUS1\_LODEL [ (score: 6.40e-04, model: Metaxin1) A5DUS1\_LODEL Putative uncharacterized protein. ]  
MIQLHVWGLQDKVSIISPQCVASVWLACLVLDSKAFEVVTSNNTNLSTSGEFPILLLENGQCISGYLAIALYLLSNYTSL  
ETLQVLNRRQQLINVGLVSQLTETLEIINQYNLFINTTNYEKYTRKLLSNFYFPMMYNLSLSFYNTAQKVKLLGLDKS  
KTSLSFNFSNNADVVAETETVNSEQSDSEVGEETNGKISGLHERYLLQKSKTKEVLKESKASMRCLMKVEKYVNEIE  
SLKESENGKEEKRDEEKEKEKEKDDNQKNNRENSYIFGNLPSSGDILFLACIYCLTSKEIPDRFIQDYLLSSQKASFSET  
AKLKIDELQKNTITNCTIRPPKGREIPSLYNEVMYWTGYVKY  
>A5DPS2\_PICGU [ (score: 8.10e-04, model: Metaxin1) A5DPS2\_PICGU Putative uncharacterized protein. ]  
MVDYELHVWGCCKSISVVFPECLAAAWLVTTTCIPHEKINIVTSLNTNLSTGVLPLVLLTKDVSYEGFGPISSFILSEFSG  
KNVIETKDLAQSAVILLIENKLVRVHQFNLYSNLKNYEGYTRKQFKKYLFPMMYNQPLKLYNVAQDQVRMAGLLPSPPG  
LFGVFSGSSGPHDEVEETSEVALSALHERQMTAKSNKRELLRQSKNSLKCLNYLGEILDDIVKLNHQLNPHRPDDTFAL  
IFNESKISVAELLLFAYIHSPTYDGLPDHAIHDYIRLKYLSFADFSQTKINELNQLLDDSAIQPPNSSQVPNLINEVRYR  
LGY  
>Q7S734\_NEUCR [ (score: 8.40e-04, model: Metaxin1) Q7S734\_NEUCR Predicted protein (Putative uncharacterized protein G11A3.010). ]  
MATTSAAPPRKWWQVPRPLOKVFDTFPLLAYDVNALPARAQSATSGDLPTLYVFSTEEALLGAPSFNPNCLKWQAFKL  
LAGVKFQILPSTNHASPTGALPFILPTRSSPTDAPSPIPSSKLHDYALKYGTSNPPEVSALRLDAYQALLDVPVIRNAWLO  
ALYRDPEYTDLLDRFYITPASSYVWRGALRHQLRRAAETEILKTGPGGAASTAVSLLVDEHSVYRAAVQALEALATLLS  
ESKTGWFFGAETPTIFDASVFAYTHLMLKYMSDAEGEVEGNMGFILASRKLGTMVRSAGSGELEQHRRRLFELLWLADSN  
AELLDAKARGNKLLQFQLQA  
>A1D2A2\_NEOFI [ (score: 1.50e-03, model: Metaxin1) A1D2A2\_NEOFI Mitochondrial outer membrane protein (Sam35), putative. ]  
MTPDNRTSGQAPEDTPSSRARDFFSVAPAPIKRIFDRFPLVTYPSNDLPHHSGIARRGNRLFVFTDPASARRGRPSFNPQ  
CLKWQAYLRFVGIIDLEIVPSNNHASPTGALPFLPALPAATTGPIPSNKLQKWAIEQVHCEEEQQLDVRFEVYASLLDHR



IRNAWLYMLYLDKDNFEAVARRLYVDPSTSNCAVRAALAMQLOHAARDELLRTSAYVDVIALEADAADAFAEALSTLLGDN  
EHFFNRPNPGLFDASVFAYTHLILDEEMGWKQNRGELLRQHENLVQHRDRLLRFF  
>Q6BJD7\_DEBHA [ (score: 2.40e-03, model: Metaxin1) Q6BJD7\_DEBHA *Debaryomyces  
hansenii* chromosome G of strain CBS767 of *Debaryomyces hansenii*. ]  
MIELHVWGHSTISVISPECLASSWLLNLHLKPQNIPIFKIVTSSNTNLSETDKLPLLLVSNEECASERYEGFHNISQYIS  
SNFDTEHSTGNDIKYVPNHNLSSEQKLINSSLTSEFIENKIHNISQYNYLYINTKNEYKYTRKLFQKFFPFPMYNOPLKF  
YHSAQRQVQVIGLNSNPGFFSISGSEAVAQTEYFNDEDDDDAEADPVAISSLHEKQLLAKSKRKDLLKESRNSLKCLN  
LVNEYIDYVVLVLYQELNSFNKPDEFSYLFSDKASNAISSSELLFFAYIHSLCLPELPDKFIVNYLTLKYPKFLTFIYDFT  
SKLNESLYKEKSIIFREPEGIEVPNLWNELIYSTGYVKY  
>Q5BFM3\_EMENI [ (score: 2.60e-03, model: Metaxin1) Q5BFM3\_EMENI Putative  
uncharacterized protein. ]  
MTSNYDDHDLPPQQRPSRRAPRRVRDFFSVPAVVKRVFDRFPLLTYPANDLPHHAGSGRSGNQLFVVIDAAGARRGRPSF  
NPQCLKWQAYLRFMGIDFELVPSNNHASPSGFLPFLPALPVGTDAPIPSNKLQNWAIIEEVHCEEEQQLNVRFEVYSSLL  
DTRIRNAWLYHLYLNHENFEAVARRLYVDPSTTNTAVRFALAAQLOQAARDELLKSSPYIDAGALEAEAAEAFEALSTVL  
GDKDYFFERPMPGLFDASVFAYTHLILDQKMGWKYNRLOQLLSQYKNLVQHRARLLEFF  
>Q6FU46\_CANGA [ (score: 2.80e-03, model: Metaxin1) Q6FU46\_CANGA Similar to  
sp|P50110 *Saccharomyces cerevisiae* YMR060c TOM37. ]  
MTGSVLYLWKGDRASGISGESIALEWYLKSKALREVEIVFANNTDISPLGRPLVVKVCSNGDYIHGFLNIVDYLEPKRKD  
EFTDMEKLMELMSAMSQDLSNLKTLNEYQLYLDKNNYITFTRKELSQLLYFPFNFAAYEYRNRAKEQCVDLEYLPVEEKE  
DEDEDGPDAMELAKSQTALRGLRKRQRAEELKSVRLNRNYMHKLEFLDQWDSITDDLPKTSPVPIILFYSYMIIQLVI  
LPNNNEICKYLKEMKSNGYVDTLKETFTKYNALDFNLNVREPVFREGRGLISTLLNKISV  
>Q4WSD2\_ASPFU [ (score: 2.90e-03, model: Metaxin1) Q4WSD2\_ASPFU Mitochondrial  
outer membrane protein (Sam35), putative. ]  
MSPDNHGASVQATEDTPSSRRARDFFSVPAPVKRIFDRFPLVITYPSNDLPHHSGIARRGNRLFVFTDPASARRGRPSFNPO  
CLKWQAYLKFVGDLELVPSNNHASPTGALPFLPALPAATTGPIPSNKLQKWAIEQVHCEEEQQLDVRFEVYASLLDHR  
IRNAWLYMLYLDKDNFEAVARRLYVDPSTSNCAVRAALAMQLOQAARDELLKTSAYVDVVALEADAADAFAEALSTLLGEN  
DHFFNRPNPGLFDASVFAYTHLILDEMGWKQNRGELLRQHKNLVQHRNRLLRFF  
>Q0UDF6\_PHANO [ (score: 3.50e-03, model: Metaxin1) Q0UDF6\_PHANO Putative  
uncharacterized protein. ]  
MSHTEEDKEPTPQSHNAPAQRSSRSLAVPTPIKQLFDIFPLLTYPVNDLPQRAPQDRNKHVLYIFTSEDGALKGLPSYN  
PACLKWQAYLKFISKIDFRIASANNHASPSGALPFIIPASPEPYKHIQVPVSGKLQWAMNNSKKAWEPEGDLRYEAYLSL  
LDHRIRRAWLYCIYLSHNSTIAEPLYILPSSGNPFVRLTIARELRTAAEKELKFSVINASTLYSQAEFAALETLL  
DKDDWFFGAPGGLFDASVFAYTHLLLDGLGKGLDTRLRDLALMSRKRLTSHRNRIILSTYFPGQS  
>Q759Y7\_ASHGO [ (score: 3.80e-03, model: Metaxin1) Q759Y7\_ASHGO ADR136Cp. ]  
MATIHLWGVGDGAPALISPECIALFWLVNTCEVECTVVFSSNAHLSPREELPLYVGEDGSAAYEYPEIVEQLLGLRELGLEE  
RSLVCWAAERCGALSDYQLYLNRKNYEQYTRRVFSQLLPWPLWYNTPVQRRERARAQRGGTPAPAHDAEKELAQHSKTLQ  
ATRELREGERKALADAAAEYAAALDRALQPWIAVRGAAATLGAPELLFAAHLVYVQQQLPDGARVTAHLRAHYPALCDG  
LLRACELHACAPRAAAVAVRAPTAAETPSVPRELYRYVTSYWTI  
>A1CPE3\_ASPCL [ (score: 4.50e-03, model: Metaxin1) A1CPE3\_ASPCL Mitochondrial  
outer membrane protein (Sam35), putative. ]  
MAPDNRGPSDQASDHTTASRRARDFFSVPTPIKRIFDQFPLVITYGPNDLPYRSGLERGNRLFVFTDPARARRGRPSFNPO  
CLKWQAYLRFVGDVETVPSNNHASPTGALPFLPALPAGTSSPISSKLQKWAIEQVHCEEEQQLNLRFEVYGSLLDHR  
IRNAWLYTLYLDQENFTAVARRLYVDPSTSNFAVRAALSMQLOQAARDELLKTSAYVDAAALEADAADAFAEALSALLGDN  
LHFFDRPNPGLFDASVFAYTHLILDEMGWKQNRGELLRQHENLVQHRERLLKFF  
>Q2HGR1\_CHAGB [ (score: 5.60e-03, model: Metaxin1) Q2HGR1\_CHAGB Putative  
uncharacterized protein. ]  
MRTLVVQATVFPVSYLPAMVLDEAAALFPFTLIDFVAPGPGSLSVEQQLASLGPPLHCAESFWLNSAQRSGPLKYCRVT  
PGESEVVGSGTLPWALLDPHVGGDAVFYQGRASHGISGALYLARGKSILLPTGFFAYSSDAADENNAACRALDEGPHLP  
WRSIVTRSAAQDICEFPHYLEGCSAIDMAKARAAEPQLASAGRWRGVEGPGFSAPSSAPGEKNSGHLTIPIGKTPKL  
LLAFGLSGPEFGRENVTKKGKSARSSSGTFRDLRRNLYAQAGEKPHPGRCVLSARSCGSRFAPYGEETEENPRIGTFT  
FTTTLRRAYLQFAERNRTARPLSSKSPFTGMSSITSPASSWRKMQIPRPLQQLFDHFLPQTYEPNHLPEQSHLTSSDLP  
TLYIFSTDADARLGLPSFNPGCLKWQTLRLAKLDFRTLPTSNHASPTGSLPFLPPRTSPTTAPLPIPASNLLAYAQRS  
QPPTGDLDPDLPPRSQAYLSLNLRSALWLYALYLDPSHAALLRQLYIRPASSRQVQAALLYQLRRAAAEQIATTSAG  
GGKIVSLAPVASVEGIDEEAVYRSAREALEALASLLSQSETGWFFGRERPGVFDAAALFSYTHLMMEYMPEEGGSAGEGTG  
VALGRMVLGAGDGELARHRERMLQTAWPGWDGYRK

>Q4SGB1\_TETNG [ (score: 8.20e-03, model: Metaxin1) Q4SGB1\_TETNG Chromosome 17 SCAF14597, whole genome shotgun sequence. ]  
MSLAEEAFVSQIAAAEPWPESATLYQPLKEDQILLSDCASSLAVQAYLRMCGLPVEVVCKANA EYMSPSGKIPFIHVGNQ  
VVSELGPVQFTKAKGHSLSLSDGLDDVQRAEMKAYMELVNNMLLTAELYIQWCDDATAAEVCLDYLLKKREKSVFIILTSL  
IKVFFQITRPRYSSPYSWPLSLLAYLSAAKLSPKDWEHNHSSLINSRFLFPYILVHMFISTEINTKCMYVTGRQNWML  
WCSATSSPSSPPDSRAQSWQGRSRATATCCPSAGASNRLTLKTRAPEGWK  
>A4RI50\_MAGGR [ (score: 8.60e-03, model: Metaxin1) A4RI50\_MAGGR Putative uncharacterized protein. ]  
MSSYNVATYLWMYGKKA AAIKLNITLAEMSFFHPNLVKKHVHLATQLLVGNAQMAEQLOQPAQGTTPPKTSAASASSA  
ATPGYTIFPGRIAPLQKLFARFPLYTYPANDLPARCPRPRESSSSNNSLPTLFVVISDDDAAKGRPSFNPTCLKWQTF  
RIAGVEVQILPSTNHASPTGALPFLPSSSPTPI PANKLOAYAAAATKANNNSSQQQPEPTTILAKESEALYTSLVDPHPIR  
RAWLHTLYLDPANTQLLTSYLSPASRSPLAQRALHAQLRAAAHAELAASHNGVDCPAPETLRADAARAFASLGAELLAG  
SGREWFTGAAGPGLLDAAVFAYTHLLALPWGDRSLAEALAAEAPALVDHRDRMLERLWGGGGGAEDCGASVEWEKI  
>Q6CMW8\_KLULA [ (score: 1.40e-178, model: Sam35) Q6CMW8\_KLULA Similar to sp|P14693 Saccharomyces cerevisiae YHR083w hypothetical protein singleton. ]  
MVSILAVPGPLKTFDFKFLKTFEYVNDKAMDYQISQRSAYFEGPDAVQSSKDDVDFQLGVYQIVRDSSETGVLLASDPW  
GLFAELSLSKNNLKL PSEGFNANGTNAPTKRRLQHSMCVLSPRASVTKSLPILVEGFTRKRHVRSTESINEILYSRIATG  
EHTMYLKLINTIVDGYIVDLLCNVPSNKFCELYAHINERETSITNWVTIQDTKTITILERNGFQIRHEVLSKYLVELKYP  
IRTPRVTLAELSENIILETINCLERLQTHWKSSKSEPDSTTNLNKYQYIDLALVSYILAIQAQLGSESVLNQWLQTNQO  
YLLQYSYQLLKKCS  
>SAM35\_YEAST [ (score: 1.60e-178, model: Sam35) SAM35\_YEAST Sorting assembly machinery 35 kDa subunit (TOB complex 38 kDa subunit) (Mitochondrial 38 kDa outer membrane protein). ]  
MVSSFSVPMPVKRIFDTFPLQTYAAQTDKDEAVALEIQRRSYTFTERRGGSSSELTVEGTYKLGVYNVFLEANTGAALATD  
PWCLFVQALALCQKNGLVLPHTSQEQTPSHTCNHEMLVLSRLSNPDEALPILVEGYKKRIIRSTVAISEIMRSRILDDAEQ  
LMYYTLLDFTVLYDCWITQIIFCASDAQFMELYSQKLSGSIVTPLDVENSLQKLSAKSLKISLTKRNKFQFRHREIVKS  
MOGVYHNHNSVNVQEQVLNVLFENSKQVLLGLKDMKSDGQPTYLHLKIASYILCITNVKEPIKLTFFVENECKELVQFA  
QDTLKNFVQ  
>Q6BK36\_DEBHA [ (score: 9.10e-172, model: Sam35) Q6BK36\_DEBHA Debaryomyces hansenii chromosome F of strain CBS767 of Debaryomyces hansenii. ]  
MFEVPKPIKKVFDTFPLYTYDPIPNNTPSNFQSIENKFYFTSSNDQAKDNACFTLGVHNIYLVNTANGEKKIPSDPISF  
GHALILCHKNDLKL PSSGDNVGSKSKHSIMKLSYHASPNDQLPILIEDDLKSQTRNIRSSLSMNQSVKVNNSNFSENALAR  
IINELVDTELADLWILCLLSDLPSSNPLVFNKLFKLD EETKSTFTNKITIMSILNEIPRWGSFHLRYSYLFDHRSRTKSF  
INMPLRLLSEDI LEVFANTNNESIRKAYNDKLKEFEINLELLIDYIKESDSNEQKKI IELKLVGFIIIMDSLNTKLHEV  
LSKEKFFSSFVKLCYEIIALFPNLYKAFI  
>Q6FSA5\_CANGA [ (score: 4.30e-168, model: Sam35) Q6FSA5\_CANGA Similar to sp|P14693 Saccharomyces cerevisiae YHR083w. ]  
MSSTTMKVPTPVKWFDRFPVQYQTI PQSKAIAYS DTVNRCFEFRDVKSSMHNPEYDGGNSKNDNSGNDNFQLGVS  
VHGFEIGGTDVMLARDPLCLYAQLSLCKKNNLRLPTKFEEGNNEKKNQPKLDAESTLDSHFTTDVAGIRKPGNKVVILSEKA  
HKDERLPILIEFTMNGQSKNIKRYVRSMDSIMIILDSKLESAELAIGNLLDFTVYDAFLLCTIHNHLVYETYGCSPDTLH  
TLSKRNRFFTRHPQISSLSLQIYTPSPSDLEKQLAMAKDILLLLQSTHDKFSDYLRLKVASYVLALLHLPSFGEFLRAE  
CSKLLDDSTTIVKDFV  
>Q759H5\_ASHGO [ (score: 3.00e-148, model: Sam35) Q759H5\_ASHGO ADR303Wp. ]  
MHTLTQVPAPIKQLFDALPLSQYGPVPATDDATLNDHAVRSYFPRGGPTDNQPTFRLGVYAVVEHESGAFLAPDPWCLLA  
QLAVCKRNGLLLP TSTSAPSKGSCVLLLSRYAAADRQLPLL VETSSRAQRGAGAVHDAVAARITDPHAALLATLLNSTVY  
DAYMATLLFELPDSELLRLYGVSAEPPLRVFAARTLRLALAFRNSFQVRNARLVSHAGAFPTPATAPARPLLDVLQARG  
SRTLLOQLLHDGQFFPAPSDCGPGYLDLAVASYVFAISLLRSSALHQYLAKHCQPLCRHAAARVISCYT  
>Q6C5Q4\_YARLI [ (score: 7.80e-141, model: Sam35) Q6C5Q4\_YARLI Similarity. ]  
MLKVPAPIKTFDFAPLEKLPPELVSETDSNACQVVGGSSTQSPDFYLYTYGHKNGVGTTLSTEPTSLAVQLLSHFHPK  
KSTQLATVSHLANMDGKLP LLVQPSNRFTLTFNSIYKNLVPLTPQINVLSL VFNHLYHAWIVTILDPAYSROFENTFL  
SVKLESNTSEARFVEPLKIRFMQDLITDHKNLATAMEQSTRLPTRLVMSMESVYDSHPEIEEIEY CRAHDALTAFSKLLAE  
SPSQFFNAKDKGFEQSEIGSLDCVVAAFIYSLRPESPFQTRLGHRMVQDFPDLSSHAVSVIEEVYKKN  
>Q59ZS4\_CANAL [ (score: 2.90e-105, model: Sam35) Q59ZS4\_CANAL Possible mitochondrial protein. ]

MNVPATIKSLFDVVPLVITYKDERLPHKGPNYPFSEEFVAVHNVFNCKGMIIPDPIISLGIVLVLAHKNKLALPTEQGYG  
RGGIITTSFHASPTNTLPLLIDQTTTRLDEINHTVANDLDEPAKLINEIIDTKFYDIWVLCILCEDIATTIFGVDTL SKL  
DLLAEVFNWNNFAVRHPNTNIPKLYSQQLVEFEEYLDLLESYDHPIINLKLAGYIIVINQLLSSTRLGKIVCTKHALLSR  
SYSLLNLHTTI

>A5DCQ6\_PICGU [ (score: 1.10e-35, model: Sam35) A5DCQ6\_PICGU Putative  
uncharacterized protein. ]

MSRLQVPQWVKSVDTFPLSTYEATPLGDHSDIEKSRFYFISDDPEKAPDHNFILGVDGVIGVNLKIIPSTPVALAHSLI  
LCYKNGLKLPRENSKSKTSPHSILSLSYLAASNNELPIIIETNERTQVRNTIPKKGLLASIVTNNNFESDPKAKLINSMV  
DSCIQDLWILTLICDPQGKNKYERIFNWNAGAKKSGNMTFLQTLAVQEEIPEWNDIRTRNPNLFPGKIWNALDQEALQIV  
YQDKLKQFEQELPLLEIYATGHDPLTKIISFKLVALAILANEILPETGLANLVQQHQNFVTCYNIIDEY

>A3LWP5\_PICST [ (score: 1.40e-24, model: Sam35) A3LWP5\_PICST Predicted protein.  
]

MFDIPESVKKLFDTFPLTTYPAIPKTTSGNDEFIEKKFYFENEKQSQISTNASFSLGVHNVVEFKGQDGKRKYIPSDPV  
SLGQALILCHKNKLKLPSTTSSTNRSCNSIMKVSFHASPKQLPILIEDDKQSRRTIRTISSIIETVAKSNFQKHPYLD AEL  
LVLNDFIDLKFLDLWILCLLNENIDRFDEIFDIDSKLDLSFVAKSLVINNIYSEVEHWRAFTRNPNLFDYMELLLSTN

>A5E230\_LODEL [ (score: 2.50e-23, model: Sam35) A5E230\_LODEL Putative  
uncharacterized protein. ]

MFSVPSPIKRVFDSVPLQVYKNGGETVQPHNLYSFSKVSELGSGPTFVVGVYNTFEYRISTSSQDSVILPTDPI SLATIL  
ILARKNGCGLPSSGAKGPSGIVRIPFRGSPFNLSLPILISGDETRSIESAETIKSTITKNNIKNLDLKFISDYVDKSLYDL  
WILCLLAEELDISVYSKIFSINDQLELHDLKTEMVKWNNLSLRHPSLFFERQQKHKNLYNFYISELDQFDTNMNWFSEILE  
KPEGDNWIIYYKIASFVIIVNQFLQSTKLGAVVVGKPDLVAKCYKVLESI

>Q5ALP4\_CANAL [ (score: 3.70e-145, model: Sam37) Q5ALP4\_CANAL Putative  
uncharacterized protein TOM37. ]

MLQLHVWGKDNEISIIISPSCIASAYLLNQVLTPQNI EF EII PSNNTNLS DINQLPVLIDNETKEKYNGYNEIIRFIESKY  
LSTSTKLSLVSYLPSDSLKTTKEKLINKGLINLLINKFEYINQYNLYLNNKNYENYTRKLFSSYLPFPMMYNQPSKYAQ  
AQEQVKILGLSKQKVSFFDFTTGNNEQGSIDVAPTELINDEDDEEGDEDEDGANVAISSLHERQLLKSKSKQVLKESRN  
SMKCLILITQYIERFKTIFQHQRDSDEEFGFIFNNQNPSSSEILFYAYIFCLTYEKL PDRFIFNYLKLKQDYTLKFITE  
IMNKNQISKKNFRNPIGNEIPSLTNEVKYWIGSIEY
